# Supplementary material
Source: Royal Society of Chemistry journal article supplement (doi:10.1039/d6ew00190d)
Supplement: d6ew00190d1.pdf [file d6ew00190d1.pdf]

Supporting Information for:  
Sonochemical Degradation of Per- and Polyfluoroalkyl Substances (PFAS):  
Mechanisms, Efficacy, and Future Directions

Takshak Shende<sup>a</sup>, Shruti Sarkate<sup>b</sup>, Md. Saiful Islam<sup>c</sup>, Gangadhar Andaluri<sup>c,\*</sup>

<sup>a</sup>*Ascend Technologies Ltd, Southampton, United Kingdom*

<sup>b</sup>*Imperial College London, London SW7 2AZ, United Kingdom*

<sup>c</sup>*Civil and Environmental Engineering Department, Temple University, Philadelphia, PA 19122, United States*

---

---

## Introduction

This Supporting Information (SI) document provides supplementary data to accompany the main manuscript, "Sonochemical Degradation of Per- and Polyfluoroalkyl Substances (PFAS): Mechanisms, Efficacy, and Future Directions." The following tables (S1-S7) compile and synthesize detailed data from the cited literature. The purpose of this document is to provide a granular reference for researchers and practitioners, summarizing:

- Key operational parameters and their mechanistic effects (Table S1).
- Effects of common water matrix components on ultrasonic PFAS degradation efficiency. (Table S2).
- Qualitative comparison of emerging hybrid ultrasonic systems for PFAS degradation (Table S3)
- Quantitative performance comparison of hybrid ultrasonic systems for PFOA and PFOS degradation (Table S4)
- Overview of documented pilot and demonstration-scale ultrasonic systems for PFAS treatment (Table S5)
- Comparative assessment of PFAS treatment technologies. (Table S6)
- A raw data compilation of PFAS degradation kinetics (Table S7).
- PFAS Sonolysis: Identified Products and Intermediates (Table S8)

---

\*Corresponding authors

Table S1: Effects of key operational parameters on ultrasonic PFAS degradation efficiency.

| Parameter     | Optimal Range                             | Effect on Degradation                                                                              | Primary Mechanism                                                                                                                                     |
|---------------|-------------------------------------------|----------------------------------------------------------------------------------------------------|-------------------------------------------------------------------------------------------------------------------------------------------------------|
| Frequency     | 300 - 600 kHz [40, 15]                    | Non-linear. Peak efficiency in this range. Lower (20-100 kHz) is ineffective for destruction [49]. | Balances bubble count (favored by high freq.) with collapse intensity (favored by low freq.) [40].                                                    |
| Power Density | High (e.g., >200 W/L)                     | Generally increases rate, but EE/O may decrease if excessive [35].                                 | Increases number and intensity of cavitation events, creating more reaction sites [17].                                                               |
| Initial Conc. | > Saturation (>15-40 $\mu\text{M}$ ) [40] | Follows L-H kinetics. Rate becomes zero-order (fastest) above saturation [17].                     | Saturates the bubble interface reaction sites, maximizing pyrolytic degradation per bubble collapse.                                                  |
| pH            | Acidic (pH 2-4) [43]                      | Significantly increases degradation rate, especially for PFCAs.                                    | Protonates the headgroup (e.g., $-\text{COO}^-$ to $-\text{COOH}$ ), increasing hydrophobicity and enhancing partitioning to the interface [43].      |
| Temperature   | Elevated (40-50 $^{\circ}\text{C}$ )      | Increases degradation rate [36].                                                                   | Enhances PFAS partitioning (volatility / surface activity) to the interface, which outweighs the slight reduction in collapse intensity [5].          |
| Sparging Gas  | Argon (Ar)                                | Dramatically increases rate (2-5x) compared to air [40].                                           | High polytropic ratio ( $\gamma$ ) and low thermal conductivity of Ar leads to a more adiabatic collapse and higher peak pyrolysis temperatures [44]. |

*Continued on next page*

Table S1 – *Continued from previous page*

| <b>Parameter</b>    | <b>Optimal Range</b> | <b>Effect on Degradation</b> | <b>Primary Mechanism</b>                                                                                                                        |
|---------------------|----------------------|------------------------------|-------------------------------------------------------------------------------------------------------------------------------------------------|
| Matrix (NOM, Salts) | Low                  | Inhibitory.                  | NOM and other surfactants compete for limited sites at the bubble interface [6]. Salts can have complex salting-in or salting-out effects [16]. |

Table S2: Effects of common water matrix components on ultrasonic PFAS degradation efficiency.

| Matrix Component                                           | Typical Conc. | Effect Magnitude               | Primary Mechanism                                                                                                  | Mitigation Strategy                                                                                   |
|------------------------------------------------------------|---------------|--------------------------------|--------------------------------------------------------------------------------------------------------------------|-------------------------------------------------------------------------------------------------------|
| Volatile Organic Compounds (VOCs)                          | mg/L          | Strongly Inhibitory            | 1. Competition for bubble interface.<br>2. Quenching of bubble collapse temperature (pyrolysis of VOCs) [40].      | Pre-treatment (e.g., air stripping) to remove VOCs.                                                   |
| Natural Organic Matter (NOM)                               | mg/L          | Inhibitory                     | 1. Competition for bubble interface.<br>2. Scavenging of any supplemental $\cdot\text{OH}$ radicals [6].           | Pre-treatment (e.g., GAC, coagulation, foam fractionation) to remove NOM.                             |
| Bicarbonate ( $\text{HCO}_3^-$ )                           | 1-10 mM       | Slightly Inhibitory            | 1. $\cdot\text{OH}$ radical scavenger.<br>2. Minor competition for interface [15].                                 | pH adjustment to $<4$ converts $\text{HCO}_3^-$ to $\text{CO}_2(g)$ , removing it from solution [43]. |
| Chloride ( $\text{Cl}^-$ ), Sulfate ( $\text{SO}_4^{2-}$ ) | 1-10 mM       | Neutral to Slightly Inhibitory | 1. Minor competition for interface.<br>2. Can alter bubble dynamics or salting-in effects [16, 6].                 | Generally not significant enough to require mitigation at low levels.                                 |
| Dissolved Salts (TDS)                                      | g/L           | Variable                       | Low TDS ( $< 1$ g/L) can be enhancing for short-chains/sulfonates [16]. High TDS ( $> 10$ g/L) is inhibitory [16]. | Minimal. Process is tolerant to low salts, but high-salinity brines may be inhibitory.                |

Table S3: Qualitative comparison of emerging hybrid ultrasonic systems for PFAS degradation.

| Hybrid System                                        | Synergistic Mechanisms                                                                                                                                                                                                                                                      | Key Advantages                                                                                            | Synergy                        | Best Application                         |
|------------------------------------------------------|-----------------------------------------------------------------------------------------------------------------------------------------------------------------------------------------------------------------------------------------------------------------------------|-----------------------------------------------------------------------------------------------------------|--------------------------------|------------------------------------------|
| Sono-Piezocatalysis<br>(e.g., PTFE, FMC)<br>[48, 25] | US vibration induces strain in piezoelectric material, generating surface charges ( $h^+$ ) and reductive electrons ( $e^-$ ).                                                                                                                                              | Reductive $e^-$ pathway is highly effective for C-F bonds. Can use waste (PTFE) or hydraulic flow energy. | High                           | Concentrated Waste, In-situ Flow-through |
| Sono-Electrochemical<br>(e.g., $Ti_4O_7$ ) [24]      | <ol style="list-style-type: none"> <li>US cavitation cleans/activates electrode surface.</li> <li>Enhanced mass transfer of PFAS to anode.</li> <li>Additive degradation (<math>\cdot OH</math> + Pyrolysis).</li> </ol>                                                    | Prevents electrode fouling/passivation. Increases reaction rate and defluorination efficiency.            | Yes<br>( $\sim 1.1$ - $1.3x$ ) | AFFF, Concentrated Waste                 |
| Sono-Persulfate (in slurry) [23, 7]                  | <ol style="list-style-type: none"> <li>US physically desorbs PFAS from solids.</li> <li>Cavitation heat activates persulfate (<math>S_2O_8^{2-}</math>) to <math>SO_4^{\cdot -}</math>.</li> <li>Additive degradation (<math>SO_4^{\cdot -}</math> + Pyrolysis).</li> </ol> | Highly effective in complex soil/sorbent matrices. Can regenerate spent adsorbents in-situ.               | High (e.g., $\sim 5.9x$ )      | Contaminated Soil, Sorbent Regeneration  |

Table S4: Quantitative performance comparison of hybrid ultrasonic systems for PFOA and PFOS degradation.

| System                                                      | Rate ( $h^{-1}$ )                           | Synergy Factor | Defluorination (%) | Optimal Conditions             | PFAS Target            |
|-------------------------------------------------------------|---------------------------------------------|----------------|--------------------|--------------------------------|------------------------|
| Sono-Piezocatalysis (PTFE) [48]                             | 2.41 (PFOA) 0.52 (PFOS)                     | High           | 91.5% (1h)         | 68 kHz, low freq.              | PFOA, PFNA, PFOS, GenX |
| Sono-Piezocatalysis (FMC, flow-driven) [25]                 | N/A (flow)                                  | High           | 99% (5 min)        | 1.68 L/min flow                | PFOA                   |
| Sono-Electrochemical (Ti <sub>4</sub> O <sub>7</sub> ) [24] | 1.74 (PFOA, Hybrid)<br>1.50 (PFOA, EO only) | ~1.15x         | 63.5% (6h)         | 130 kHz, 50 mA/cm <sup>2</sup> | PFOA, AFFF             |
| Sono-Persulfate (in water) [23]                             | ~1.9 (PFOA, Hybrid)<br>~0.31 (US only)      | ~5.9x          | 100% (6h)          | 20/43 kHz, pH 3.7              | PFOA, FTS, PFOS        |
| Sono-Persulfate (on biochar) [7]                            | N/A                                         | High           | 99.6% (10h)        | 500 W, 20 mM PS, pH 3          | Adsorbed PFOA          |

Table S5: Overview of documented pilot and demonstration-scale ultrasonic systems for PFAS treatment.

| Application              | Capacity     | System Configuration                                | Influent PFAS Conc.                  | PFAS Removal                                           | Key Performance Metrics                                                                |
|--------------------------|--------------|-----------------------------------------------------|--------------------------------------|--------------------------------------------------------|----------------------------------------------------------------------------------------|
| AFFF Treatment [12]      | 91 L (Batch) | Dual-frequency (500/1000 kHz), 12-transducer, 12 kW | 3M & Ansul AFFF (25x-900x dilution)  | 90.6% reduction of PFSA>C6 (3M AFFF, 13h)              | Cost: \$0.015 - \$0.019 / L (at 500x dilution).                                        |
| Groundwater / IDW [16]   | 2 L (Batch)  | 700 kHz, 1040 W, Closed System                      | GW (low/high TDS), IDW (mg/L levels) | >90% for most PFAS in IDW (4h). Rates varied with TDS. | $E_{EM}$ : 3-76 kWh/g (for IDW) vs. $\sim$ 5900 kWh/g (for dilute AFFF).               |
| In-situ Groundwater [21] | 12 L (Batch) | 430/1300 kHz, 600 W                                 | GW (S3: $\sim$ 100 $\mu$ g/L PFOS)   | Theoretical 90% removal (HRT-dependent).               | $E_{EO}$ : High (1000s kWh/m <sup>3</sup> ). LSA showed potential vs. P&T in low-flow. |

Table S6: Comparative assessment of PFAS treatment technologies.

| Technology                     | Operating Cost                      | PFAS Fate                    | Typical (kWh/m <sup>3</sup> ) | EE/O   | Key Advantages                                                                                                  | Key Limitations                                                                                                                         |
|--------------------------------|-------------------------------------|------------------------------|-------------------------------|--------|-----------------------------------------------------------------------------------------------------------------|-----------------------------------------------------------------------------------------------------------------------------------------|
| Sonolysis (High Freq.)         | High (Energy)                       | Mineralization               | 10 - 10,000 [27, 20, 15]      |        | No additives required. Complete mineralization (no short-chain intermediates) [26]. Effective for various PFAS. | High $E_{EO}$ for dilute solutions [20]. Complex acoustic field in large reactors.                                                      |
| Electrochemical Oxidation (EO) | High (Energy, Electrode)            | Mineralization               | 10 - 500 [24]                 |        | High degradation rates. Effective for many PFAS.                                                                | Electrode fouling/passivation [24]. Potential byproducts (e.g., ClO <sub>4</sub> <sup>-</sup> ) in brines. High cost of BDD electrodes. |
| Plasma                         | High (Energy)                       | Destruction                  | 100 - 1000s                   |        | Very rapid degradation rates. Effective in various matrices.                                                    | Often produces short-chain fluorinated byproducts [40]. Complex equipment.                                                              |
| Hydrothermal (SCWO)            | Very High (Energy, Pressure)        | Destruction                  | N/A (Energy intensive)        |        | Rapidly destroys high concentrations.                                                                           | Extreme temperature (>374 °C) and pressure (>221 bar). Corrosion and salt precipitation issues.                                         |
| Adsorption (GAC / IX)          | Low (OpEx), High (CapEx / Disposal) | <b>Separation</b> (Transfer) | N/A (Non-destructive)         | (Non-) | Mature, well-understood technology. Relatively low operational cost. Effective for dilute streams [46].         | <b>Non-destructive.</b> Generates concentrated waste requiring further treatment or disposal [46].                                      |
| Sono-Piezocatalysis            | Low to Medium                       | Destruction                  | Emerging (<100 reported) [48] |        | Novel pathway (e- reduction). Can use "waste" energy (hydraulic flow [25]) or waste catalyst (PTFE).            | Nascent technology. Scalability and long-term catalyst stability are unknown.                                                           |

Table S7: Compilation of PFAS degradation data from various literature sources.

| PFAS<br>Com-<br>pound | Initial<br>Conc.<br>(mg L <sup>-1</sup> ) | Frequency<br>(kHz) | Power<br>Density<br>(W L <sup>-1</sup> ) | Dissolved<br>Gas | Additive                            | Rate<br>Const.<br>Type | Rate Const.                            | Reference |
|-----------------------|-------------------------------------------|--------------------|------------------------------------------|------------------|-------------------------------------|------------------------|----------------------------------------|-----------|
| PFOA                  | 49.7                                      | 40                 | 166.7                                    | O <sub>2</sub>   | Sol-gel<br>TiO <sub>2</sub> +<br>UV | pseudo-1st             | $2.20 \times 10^{-3} \text{ min}^{-1}$ | [30]      |
| PFOA                  | 70.4                                      | 40                 | 500                                      | N <sub>2</sub>   | None                                | pseudo-1st             | $2.40 \times 10^{-3} \text{ min}^{-1}$ | [22]      |
| PFOA                  | 70.4                                      | 40                 | 500                                      | N <sub>2</sub>   | IO <sub>4</sub>                     | pseudo-1st             | $2.22 \times 10^{-2} \text{ min}^{-1}$ | [22]      |
| PFOA                  | 70.4                                      | 40                 | 500                                      | O <sub>2</sub>   | IO <sub>4</sub>                     | pseudo-1st             | $3.70 \times 10^{-3} \text{ min}^{-1}$ | [22]      |
| PFOA                  | 70.4                                      | 40                 | 500                                      | Air              | IO <sub>4</sub>                     | pseudo-1st             | $5.30 \times 10^{-3} \text{ min}^{-1}$ | [22]      |
| PFOA                  | 70.4                                      | 40                 | 500                                      | N <sub>2</sub>   | IO <sub>4</sub>                     | pseudo-1st             | $9.20 \times 10^{-3} \text{ min}^{-1}$ | [22]      |
| PFOA                  | 50.0                                      | 40                 | 150                                      | Air              | None                                | pseudo-1st             | $1.20 \times 10^{-3} \text{ min}^{-1}$ | [42]      |
| PFOA                  | 50.0                                      | 40                 | 150                                      | N <sub>2</sub>   | NaHCO <sub>3</sub>                  | pseudo-1st             | $2.40 \times 10^{-2} \text{ min}^{-1}$ | [42]      |
| PFOA                  | 10.0                                      | 200                | -                                        | Air              | None                                | pseudo-1st             | $1.55 \times 10^{-2} \text{ min}^{-1}$ | [29]      |
| PFOA                  | 10.0                                      | 200                | -                                        | Ar               | None                                | pseudo-1st             | $3.20 \times 10^{-2} \text{ min}^{-1}$ | [29]      |
| PFOS                  | 10.0                                      | 200                | -                                        | Ar               | None                                | pseudo-1st             | $1.60 \times 10^{-2} \text{ min}^{-1}$ | [29]      |
| PFOS                  | 10.0                                      | 200                | -                                        | Air              | None                                | pseudo-1st             | $6.80 \times 10^{-3} \text{ min}^{-1}$ | [29]      |
| PFOA                  | 0.0083                                    | 354                | 250                                      | Ar               | None                                | pseudo-1st             | $0.044 \text{ min}^{-1}$               | [43]      |
| PFOA                  | 0.8281                                    | 354                | 250                                      | Ar               | None                                | pseudo-1st             | $0.047 \text{ min}^{-1}$               | [43]      |

*Continued on next page*

Table S7 – Continued from previous page

| <b>PFAS<br/>Com-<br/>pound</b> | <b>Initial<br/>Conc.<br/>(mg L<sup>-1</sup>)</b> | <b>Frequency<br/>(kHz)</b> | <b>Power<br/>Density<br/>(W L<sup>-1</sup>)</b> | <b>Dissolved<br/>Gas</b> | <b>Additive</b> | <b>Rate<br/>Const.<br/>Type</b> | <b>Rate Const.</b>       | <b>Reference</b> |
|--------------------------------|--------------------------------------------------|----------------------------|-------------------------------------------------|--------------------------|-----------------|---------------------------------|--------------------------|------------------|
| PFOA                           | 5.4                                              | 354                        | 250                                             | Ar                       | None            | pseudo-1st                      | 0.026 min <sup>-1</sup>  | [43]             |
| PFOA                           | 12.42                                            | 354                        | 250                                             | Ar                       | None            | pseudo-1st                      | 0.0088 min <sup>-1</sup> | [43]             |
| PFOA                           | 17.59                                            | 354                        | 250                                             | Ar                       | None            | 0th                             | 156 M/min                | [43]             |
| PFOA                           | 60.04                                            | 354                        | 250                                             | Ar                       | None            | 0th                             | 314 M/min                | [43]             |
| PFOA                           | 91.50                                            | 354                        | 250                                             | Ar                       | None            | 0th                             | 1022M/min                | [43]             |
| PFOS                           | 0.01                                             | 354                        | 250                                             | Ar                       | None            | pseudo-1st                      | 0.024 min <sup>-1</sup>  | [43]             |
| PFOS                           | 0.1                                              | 354                        | 250                                             | Ar                       | None            | pseudo-1st                      | 0.028 min <sup>-1</sup>  | [43]             |
| PFOS                           | 1                                                | 354                        | 250                                             | Ar                       | None            | pseudo-1st                      | 0.028 min <sup>-1</sup>  | [43]             |
| PFOS                           | 3.6                                              | 354                        | 250                                             | Ar                       | None            | pseudo-1st                      | 0.023min <sup>-1</sup>   | [43]             |
| PFOS                           | 7                                                | 354                        | 250                                             | Ar                       | None            | pseudo-1st                      | 0.019 min <sup>-1</sup>  | [43]             |
| PFOS                           | 8                                                | 354                        | 250                                             | Ar                       | None            | pseudo-1st                      | 0.019 min <sup>-1</sup>  | [43]             |
| PFOS                           | 13                                               | 354                        | 250                                             | Ar                       | None            | 0th                             | 56 M/min                 | [43]             |
| PFOS                           | 15                                               | 354                        | 250                                             | Ar                       | None            | 0th                             | 69M/min                  | [43]             |
| PFOS                           | 19                                               | 354                        | 250                                             | Ar                       | None            | 0th                             | 152 M/min                | [43]             |
| PFOS                           | 33                                               | 354                        | 250                                             | Ar                       | None            | 0th                             | 170 M/min                | [43]             |
| PFOS                           | 58                                               | 354                        | 250                                             | Ar                       | None            | 0th                             | 250 M/min                | [43]             |
| PFOS                           | 101                                              | 354                        | 250                                             | Ar                       | None            | 0th                             | 1150 M/min               | [43]             |

Continued on next page

Table S7 – Continued from previous page

| PFAS<br>Com-<br>pound | Initial<br>Conc.<br>(mg L <sup>-1</sup> ) | Frequency<br>(kHz) | Power<br>Density<br>(W L <sup>-1</sup> ) | Dissolved<br>Gas | Additive | Rate<br>Const.<br>Type | Rate Const.                              | Reference |
|-----------------------|-------------------------------------------|--------------------|------------------------------------------|------------------|----------|------------------------|------------------------------------------|-----------|
| PFOA                  | 4.97                                      | 618                | 250                                      | Ar               | None     | pseudo-1st             | $3.60 \times 10^{-2} \text{ min}^{-1}$   | [44]      |
| PFOA                  | 0.103                                     | 354                | 250                                      | Ar               | None     | pseudo-1st             | $4.10 \times 10^{-2} \text{ min}^{-1}$   | [44]      |
| PFOS                  | 5.38                                      | 618                | 250                                      | Ar               | None     | pseudo-1st             | $2.60 \times 10^{-2} \text{ min}^{-1}$   | [44]      |
| PFOS                  | 0.104                                     | 354                | 250                                      | Ar               | None     | pseudo-1st             | $2.70 \times 10^{-2} \text{ min}^{-1}$   | [44]      |
| PFOS                  | 5.0                                       | 500                |                                          | Ar               | None     | 0th_F                  | $7.4 \times 10^{-4} \text{ mM/min}$      | [33]      |
| PFOS                  | 50                                        | 500                |                                          | Ar               | None     | 0th_F                  | $3.6 \times 10^{-3} \text{ mM/min}$      | [33]      |
| PFOS                  | 230                                       | 500                |                                          | Ar               | None     | 0th_F                  | $6.1 \times 10^{-3} \text{ mM/min}$      | [33]      |
| PFOS                  | 5.0                                       | 1000               |                                          | Ar               | None     | 0th_F                  | $9.5 \times 10^{-4} \text{ mM/min}$      | [33]      |
| PFOS                  | 50                                        | 1000               |                                          | Ar               | None     | 0th_F                  | $6 \times 10^{-3} \text{ mM/min}$        | [33]      |
| PFOS                  | 230                                       | 1000               |                                          | Ar               | None     | 0th_F                  | $5.1 \times 10^{-3} \text{ mM/min}$      | [33]      |
| PFOS                  | 10.0                                      | 400                | 100                                      | Air              | None     | 0th                    | $66.5 \mu\text{g L}^{-1}\text{min}^{-1}$ | [45]      |
| PFOS                  | 10.0                                      | 400                | 100                                      | Air              | None     | 0th_F                  | $42.7 \mu\text{g L}^{-1}\text{min}^{-1}$ | [45]      |
| PFOS                  | 10.0                                      | 500                | 100                                      | Air              | None     | 0th                    | $54.2 \mu\text{g L}^{-1}\text{min}^{-1}$ | [45]      |
| PFOS                  | 10.0                                      | 500                | 100                                      | Air              | None     | 0th_F                  | $39.8 \mu\text{g L}^{-1}\text{min}^{-1}$ | [45]      |
| PFOS                  | 10.0                                      | 1000               | 100                                      | Air              | None     | 0th                    | $53.1 \mu\text{g L}^{-1}\text{min}^{-1}$ | [45]      |
| PFOS                  | 10.0                                      | 1000               | 100                                      | Air              | None     | 0th_F                  | $38.5 \mu\text{g L}^{-1}\text{min}^{-1}$ | [45]      |
| PFOA                  | 0.1                                       | 612                | 250                                      | Ar               | None     | pseudo-1st             | $0.0366 \text{ min}^{-1}$                | [6]       |

Continued on next page

Table S7 – Continued from previous page

| <b>PFAS<br/>Com-<br/>pound</b> | <b>Initial<br/>Conc.<br/>(mg L<sup>-1</sup>)</b> | <b>Frequency<br/>(kHz)</b> | <b>Power<br/>Density<br/>(W L<sup>-1</sup>)</b> | <b>Dissolved<br/>Gas</b> | <b>Additive</b> | <b>Rate<br/>Const.<br/>Type</b> | <b>Rate Const.</b>       | <b>Reference</b> |
|--------------------------------|--------------------------------------------------|----------------------------|-------------------------------------------------|--------------------------|-----------------|---------------------------------|--------------------------|------------------|
| PFOA                           | 0.1                                              | 612                        | 250                                             | Ar                       | Groundwater     | pseudo-1st                      | 0.0291 min <sup>-1</sup> | [6]              |
| PFOS                           | 0.1                                              | 612                        | 250                                             | Ar                       | None            | pseudo-1st                      | 0.0192 min <sup>-1</sup> | [6]              |
| PFOS                           | 0.1                                              | 612                        | 250                                             | Ar                       | Groundwater     | pseudo-1st                      | 0.0135 min <sup>-1</sup> | [6]              |
| PFOA                           | 0.0994                                           | 358                        | 83.3                                            | Ar                       | None            | pseudo-1st                      | 0.0063 min <sup>-1</sup> | [3]              |
| PFOA                           | 0.0994                                           | 358                        | 166.7                                           | Ar                       | None            | pseudo-1st                      | 0.022 min <sup>-1</sup>  | [3]              |
| PFOA                           | 0.0994                                           | 358                        | 250.0                                           | Ar                       | None            | pseudo-1st                      | 0.048 min <sup>-1</sup>  | [3]              |
| PFOA                           | 0.0994                                           | 358                        | 333.3                                           | Ar                       | None            | pseudo-1st                      | 0.057 min <sup>-1</sup>  | [3]              |
| PFOA                           | 0.0994                                           | 610                        | 83.3                                            | Ar                       | None            | pseudo-1st                      | 0.008 min <sup>-1</sup>  | [3]              |
| PFOA                           | 0.0994                                           | 610                        | 166.7                                           | Ar                       | None            | pseudo-1st                      | 0.023 min <sup>-1</sup>  | [3]              |
| PFOA                           | 0.0994                                           | 610                        | 250.0                                           | Ar                       | None            | pseudo-1st                      | 0.034 min <sup>-1</sup>  | [3]              |
| PFOA                           | 0.0994                                           | 610                        | 333.3                                           | Ar                       | None            | pseudo-1st                      | 0.043 min <sup>-1</sup>  | [3]              |
| PFOS                           | 0.1000                                           | 358                        | 83.3                                            | Ar                       | None            | pseudo-1st                      | 0.007 min <sup>-1</sup>  | [3]              |
| PFOS                           | 0.1000                                           | 358                        | 166.7                                           | Ar                       | None            | pseudo-1st                      | 0.017 min <sup>-1</sup>  | [3]              |
| PFOS                           | 0.1000                                           | 358                        | 250.0                                           | Ar                       | None            | pseudo-1st                      | 0.028 min <sup>-1</sup>  | [3]              |
| PFOS                           | 0.1000                                           | 358                        | 333.3                                           | Ar                       | None            | pseudo-1st                      | 0.040 min <sup>-1</sup>  | [3]              |
| PFOS                           | 0.1000                                           | 610                        | 83.3                                            | Ar                       | None            | pseudo-1st                      | 0.005 min <sup>-1</sup>  | [3]              |
| PFOS                           | 0.1000                                           | 610                        | 166.7                                           | Ar                       | None            | pseudo-1st                      | 0.018 min <sup>-1</sup>  | [3]              |

Continued on next page

Table S7 – Continued from previous page

| <b>PFAS<br/>Com-<br/>pound</b> | <b>Initial<br/>Conc.<br/>(mg L<sup>-1</sup>)</b> | <b>Frequency<br/>(kHz)</b> | <b>Power<br/>Density<br/>(W L<sup>-1</sup>)</b> | <b>Dissolved<br/>Gas</b> | <b>Additive</b> | <b>Rate<br/>Const.<br/>Type</b> | <b>Rate Const.</b>      | <b>Reference</b> |
|--------------------------------|--------------------------------------------------|----------------------------|-------------------------------------------------|--------------------------|-----------------|---------------------------------|-------------------------|------------------|
| PFOS                           | 0.1000                                           | 610                        | 250.0                                           | Ar                       | None            | pseudo-1st                      | 0.022 min <sup>-1</sup> | [3]              |
| PFOS                           | 0.1000                                           | 610                        | 333.3                                           | Ar                       | None            | pseudo-1st                      | 0.029 min <sup>-1</sup> | [3]              |
| PFHxA                          | 0.1005                                           | 202                        | 83.3                                            | Ar                       | None            | pseudo-1st                      | 0.007 min <sup>-1</sup> | [3]              |
| PFHxA                          | 0.1005                                           | 202                        | 166.7                                           | Ar                       | None            | pseudo-1st                      | 0.016 min <sup>-1</sup> | [3]              |
| PFHxA                          | 0.1005                                           | 202                        | 250.0                                           | Ar                       | None            | pseudo-1st                      | 0.019 min <sup>-1</sup> | [3]              |
| PFHxA                          | 0.1005                                           | 202                        | 333.3                                           | Ar                       | None            | pseudo-1st                      | 0.025 min <sup>-1</sup> | [3]              |
| PFHxA                          | 0.1005                                           | 610                        | 83.3                                            | Ar                       | None            | pseudo-1st                      | 0.010 min <sup>-1</sup> | [3]              |
| PFHxA                          | 0.1005                                           | 610                        | 166.7                                           | Ar                       | None            | pseudo-1st                      | 0.021 min <sup>-1</sup> | [3]              |
| PFHxA                          | 0.1005                                           | 610                        | 250.0                                           | Ar                       | None            | pseudo-1st                      | 0.036 min <sup>-1</sup> | [3]              |
| PFHxA                          | 0.1005                                           | 610                        | 333.3                                           | Ar                       | None            | pseudo-1st                      | 0.034 min <sup>-1</sup> | [3]              |
| PFHxS                          | 0.0920                                           | 202                        | 83.3                                            | Ar                       | None            | pseudo-1st                      | 0.005 min <sup>-1</sup> | [3]              |
| PFHxS                          | 0.0920                                           | 202                        | 166.7                                           | Ar                       | None            | pseudo-1st                      | 0.012 min <sup>-1</sup> | [3]              |
| PFHxS                          | 0.0920                                           | 202                        | 250.0                                           | Ar                       | None            | pseudo-1st                      | 0.012 min <sup>-1</sup> | [3]              |
| PFHxS                          | 0.0920                                           | 202                        | 333.3                                           | Ar                       | None            | pseudo-1st                      | 0.016 min <sup>-1</sup> | [3]              |
| PFHxS                          | 0.0920                                           | 610                        | 83.3                                            | Ar                       | None            | pseudo-1st                      | 0.007 min <sup>-1</sup> | [3]              |
| PFHxS                          | 0.0920                                           | 610                        | 166.7                                           | Ar                       | None            | pseudo-1st                      | 0.014 min <sup>-1</sup> | [3]              |
| PFHxS                          | 0.0920                                           | 610                        | 250.0                                           | Ar                       | None            | pseudo-1st                      | 0.022 min <sup>-1</sup> | [3]              |

Continued on next page

Table S7 – Continued from previous page

| PFAS<br>Com-<br>pound | Initial<br>Conc.<br>(mg L <sup>-1</sup> ) | Frequency<br>(kHz) | Power<br>Density<br>(W L <sup>-1</sup> ) | Dissolved<br>Gas | Additive | Rate<br>Const.<br>Type | Rate Const.              | Reference |
|-----------------------|-------------------------------------------|--------------------|------------------------------------------|------------------|----------|------------------------|--------------------------|-----------|
| PFHxS                 | 0.0920                                    | 610                | 333.3                                    | Ar               | None     | pseudo-1st             | 0.027 min <sup>-1</sup>  | [3]       |
| PFBA                  | 0.1006                                    | 202                | 83.3                                     | Ar               | None     | pseudo-1st             | 0.0044 min <sup>-1</sup> | [3]       |
| PFBA                  | 0.1006                                    | 202                | 166.7                                    | Ar               | None     | pseudo-1st             | 0.0064 min <sup>-1</sup> | [3]       |
| PFBA                  | 0.1006                                    | 202                | 250.0                                    | Ar               | None     | pseudo-1st             | 0.0072 min <sup>-1</sup> | [3]       |
| PFBA                  | 0.1006                                    | 202                | 333.3                                    | Ar               | None     | pseudo-1st             | 0.0065 min <sup>-1</sup> | [3]       |
| PFBA                  | 0.1006                                    | 610                | 83.3                                     | Ar               | None     | pseudo-1st             | 0.0037 min <sup>-1</sup> | [3]       |
| PFBA                  | 0.1006                                    | 610                | 166.7                                    | Ar               | None     | pseudo-1st             | 0.0061 min <sup>-1</sup> | [3]       |
| PFBA                  | 0.1006                                    | 610                | 250.0                                    | Ar               | None     | pseudo-1st             | 0.017 min <sup>-1</sup>  | [3]       |
| PFBA                  | 0.1006                                    | 610                | 333.3                                    | Ar               | None     | pseudo-1st             | 0.021 min <sup>-1</sup>  | [3]       |
| PFBS                  | 0.0900                                    | 202                | 83.3                                     | Ar               | None     | pseudo-1st             | 0.0048 min <sup>-1</sup> | [3]       |
| PFBS                  | 0.0900                                    | 202                | 166.7                                    | Ar               | None     | pseudo-1st             | 0.009 min <sup>-1</sup>  | [3]       |
| PFBS                  | 0.0900                                    | 202                | 250.0                                    | Ar               | None     | pseudo-1st             | 0.013 min <sup>-1</sup>  | [3]       |
| PFBS                  | 0.0900                                    | 202                | 333.3                                    | Ar               | None     | pseudo-1st             | 0.013 min <sup>-1</sup>  | [3]       |
| PFBS                  | 0.0900                                    | 610                | 83.3                                     | Ar               | None     | pseudo-1st             | 0.004 min <sup>-1</sup>  | [3]       |
| PFBS                  | 0.0900                                    | 610                | 166.7                                    | Ar               | None     | pseudo-1st             | 0.006 min <sup>-1</sup>  | [3]       |
| PFBS                  | 0.0900                                    | 610                | 250.0                                    | Ar               | None     | pseudo-1st             | 0.017 min <sup>-1</sup>  | [3]       |
| PFBS                  | 0.0900                                    | 610                | 333.3                                    | Ar               | None     | pseudo-1st             | 0.021 min <sup>-1</sup>  | [3]       |

Continued on next page

Table S7 – Continued from previous page

| PFAS<br>Com-<br>pound | Initial<br>Conc.<br>(mg L <sup>-1</sup> ) | Frequency<br>(kHz) | Power<br>Density<br>(W L <sup>-1</sup> ) | Dissolved<br>Gas | Additive | Rate<br>Const.<br>Type | Rate Const.              | Reference |
|-----------------------|-------------------------------------------|--------------------|------------------------------------------|------------------|----------|------------------------|--------------------------|-----------|
| PFHxA                 | 0.1005                                    | 202                | 250                                      | Ar               | None     | pseudo-1st             | 0.019 min <sup>-1</sup>  | [4]       |
| PFHxS                 | 0.0920                                    | 202                | 250                                      | Ar               | None     | pseudo-1st             | 0.012 min <sup>-1</sup>  | [4]       |
| PFBA                  | 0.1006                                    | 202                | 250                                      | Ar               | None     | pseudo-1st             | 0.007 min <sup>-1</sup>  | [4]       |
| PFBS                  | 0.0900                                    | 202                | 250                                      | Ar               | None     | pseudo-1st             | 0.013 min <sup>-1</sup>  | [4]       |
| PFHxA                 | 0.1005                                    | 358                | 250                                      | Ar               | None     | pseudo-1st             | 0.039 min <sup>-1</sup>  | [4]       |
| PFHxS                 | 0.0920                                    | 358                | 250                                      | Ar               | None     | pseudo-1st             | 0.030 min <sup>-1</sup>  | [4]       |
| PFBA                  | 0.1006                                    | 358                | 250                                      | Ar               | None     | pseudo-1st             | 0.012 min <sup>-1</sup>  | [4]       |
| PFBS                  | 0.0900                                    | 358                | 250                                      | Ar               | None     | pseudo-1st             | 0.018 min <sup>-1</sup>  | [4]       |
| PFHxA                 | 0.1005                                    | 610                | 250                                      | Ar               | None     | pseudo-1st             | 0.036 min <sup>-1</sup>  | [4]       |
| PFHxS                 | 0.0920                                    | 610                | 250                                      | Ar               | None     | pseudo-1st             | 0.022 min <sup>-1</sup>  | [4]       |
| PFBA                  | 0.1006                                    | 610                | 250                                      | Ar               | None     | pseudo-1st             | 0.017 min <sup>-1</sup>  | [4]       |
| PFBS                  | 0.0900                                    | 610                | 250                                      | Ar               | None     | pseudo-1st             | 0.023 min <sup>-1</sup>  | [4]       |
| PFHxA                 | 0.1005                                    | 1060               | 250                                      | Ar               | None     | pseudo-1st             | 0.022 min <sup>-1</sup>  | [4]       |
| PFHxS                 | 0.0920                                    | 1060               | 250                                      | Ar               | None     | pseudo-1st             | 0.012 min <sup>-1</sup>  | [4]       |
| PFBA                  | 0.1006                                    | 1060               | 250                                      | Ar               | None     | pseudo-1st             | 0.008 min <sup>-1</sup>  | [4]       |
| PFBS                  | 0.0900                                    | 1060               | 250                                      | Ar               | None     | pseudo-1st             | 0.009 min <sup>-1</sup>  | [4]       |
| PFOA                  | 0.0352                                    | 575                | 262                                      | Air              | None     | pseudo-1st             | 0.0860 min <sup>-1</sup> | [35]      |

Continued on next page

Table S7 – Continued from previous page

| <b>PFAS<br/>Com-<br/>pound</b> | <b>Initial<br/>Conc.</b><br>(mg L <sup>-1</sup> ) | <b>Frequency</b><br>(kHz) | <b>Power<br/>Density</b><br>(W L <sup>-1</sup> ) | <b>Dissolved<br/>Gas</b> | <b>Additive</b> | <b>Rate<br/>Const.</b><br><b>Type</b> | <b>Rate Const.</b>       | <b>Reference</b> |
|--------------------------------|---------------------------------------------------|---------------------------|--------------------------------------------------|--------------------------|-----------------|---------------------------------------|--------------------------|------------------|
| PFOS                           | 0.0510                                            | 575                       | 262                                              | Air                      | None            | pseudo-1st                            | 0.0680 min <sup>-1</sup> | [35]             |
| PFOA                           | 0.0402                                            | 575                       | 147                                              | Air                      | None            | pseudo-1st                            | 0.0240 min <sup>-1</sup> | [35]             |
| PFOS                           | 0.0545                                            | 575                       | 147                                              | Air                      | None            | pseudo-1st                            | 0.0370 min <sup>-1</sup> | [35]             |
| PFOA                           | 0.0431                                            | 575                       | 77                                               | Air                      | None            | pseudo-1st                            | 0.0100 min <sup>-1</sup> | [35]             |
| PFOS                           | 0.0600                                            | 575                       | 77                                               | Air                      | None            | pseudo-1st                            | 0.0050 min <sup>-1</sup> | [35]             |
| PFOA                           | 0.0418                                            | 575                       | 52                                               | Air                      | None            | pseudo-1st                            | 0.0030 min <sup>-1</sup> | [35]             |
| PFOS                           | 0.0590                                            | 575                       | 52                                               | Air                      | None            | pseudo-1st                            | 0.0025 min <sup>-1</sup> | [35]             |
| PFOA                           | 0.0402                                            | 575                       | 30                                               | Air                      | None            | pseudo-1st                            | 0.0025 min <sup>-1</sup> | [35]             |
| PFOS                           | 0.0570                                            | 575                       | 30                                               | Air                      | None            | pseudo-1st                            | 0.0020 min <sup>-1</sup> | [35]             |
| PFOA                           | 0.0580                                            | 575                       | 262                                              | Argon                    | None            | pseudo-1st                            | 0.0820 min <sup>-1</sup> | [35]             |
| PFOS                           | 0.0595                                            | 575                       | 262                                              | Argon                    | None            | pseudo-1st                            | 0.0710 min <sup>-1</sup> | [35]             |
| PFOA                           | 0.0576                                            | 575                       | 147                                              | Argon                    | None            | pseudo-1st                            | 0.0520 min <sup>-1</sup> | [35]             |
| PFOS                           | 0.0640                                            | 575                       | 147                                              | Argon                    | None            | pseudo-1st                            | 0.0450 min <sup>-1</sup> | [35]             |
| PFOA                           | 0.0497                                            | 575                       | 77                                               | Argon                    | None            | pseudo-1st                            | 0.0150 min <sup>-1</sup> | [35]             |
| PFOS                           | 0.0595                                            | 575                       | 77                                               | Argon                    | None            | pseudo-1st                            | 0.0120 min <sup>-1</sup> | [35]             |
| PFOA                           | 0.0634                                            | 575                       | 52                                               | Argon                    | None            | pseudo-1st                            | 0.0080 min <sup>-1</sup> | [35]             |
| PFOS                           | 0.0785                                            | 575                       | 52                                               | Argon                    | None            | pseudo-1st                            | 0.0070 min <sup>-1</sup> | [35]             |

Continued on next page

Table S7 – Continued from previous page

| PFAS<br>Com-<br>pound | Initial<br>Conc.<br>(mg L <sup>-1</sup> ) | Frequency<br>(kHz) | Power<br>Density<br>(W L <sup>-1</sup> ) | Dissolved<br>Gas | Additive | Rate<br>Const.<br>Type | Rate Const.                                       | Reference |
|-----------------------|-------------------------------------------|--------------------|------------------------------------------|------------------|----------|------------------------|---------------------------------------------------|-----------|
| PFOA                  | 0.0571                                    | 575                | 30                                       | Argon            | None     | pseudo-1st             | 0.0040 min <sup>-1</sup>                          | [35]      |
| PFOS                  | 0.0760                                    | 575                | 30                                       | Argon            | None     | pseudo-1st             | 0.0050 min <sup>-1</sup>                          | [35]      |
| PFOA                  | 0.0083                                    | 575                | 30                                       | Air              | None     | 0th                    | 9.48E-06<br>mol L <sup>-1</sup> min <sup>-1</sup> | [34]      |
| PFOS                  | 0.0100                                    | 575                | 30                                       | Air              | None     | 0th                    | 4.66E-06<br>mol L <sup>-1</sup> min <sup>-1</sup> | [34]      |
| PFOA                  | 0.0083                                    | 860                | 50                                       | Air              | None     | 0th                    | 7.15E-06<br>mol L <sup>-1</sup> min <sup>-1</sup> | [34]      |
| PFOS                  | 0.0100                                    | 860                | 50                                       | Air              | None     | 0th                    | 4.00E-06<br>mol L <sup>-1</sup> min <sup>-1</sup> | [34]      |
| PFOA                  | 0.0083                                    | 1140               | 62.8                                     | Air              | None     | 0th                    | 7.32E-06<br>mol L <sup>-1</sup> min <sup>-1</sup> | [34]      |
| PFOS                  | 0.0100                                    | 1140               | 62.8                                     | Air              | None     | 0th                    | 6.00E-06<br>mol L <sup>-1</sup> min <sup>-1</sup> | [34]      |
| PFOA                  | 0.0414                                    | 575                | 77                                       | Air              | None     | pseudo-1st             | 0.0235 min <sup>-1</sup>                          | [34]      |
| PFOS                  | 0.0500                                    | 575                | 77                                       | Air              | None     | pseudo-1st             | 0.0060 min <sup>-1</sup>                          | [34]      |
| PFOA                  | 0.0414                                    | 860                | 113                                      | Air              | None     | pseudo-1st             | 0.0230 min <sup>-1</sup>                          | [34]      |

Continued on next page

Table S7 – Continued from previous page

| PFAS<br>Com-<br>pound | Initial<br>Conc.<br>(mg L <sup>-1</sup> ) | Frequency<br>(kHz) | Power<br>Density<br>(W L <sup>-1</sup> ) | Dissolved<br>Gas | Additive      | Rate<br>Const.<br>Type | Rate Const.                               | Reference |
|-----------------------|-------------------------------------------|--------------------|------------------------------------------|------------------|---------------|------------------------|-------------------------------------------|-----------|
| PFOS                  | 0.0500                                    | 860                | 113                                      | Air              | None          | pseudo-1st             | 0.0070 min <sup>-1</sup>                  | [34]      |
| PFOA                  | 0.0414                                    | 1140               | 148                                      | Air              | None          | pseudo-1st             | 0.0225 min <sup>-1</sup>                  | [34]      |
| PFOS                  | 0.0500                                    | 1140               | 148                                      | Air              | None          | pseudo-1st             | 0.0065 min <sup>-1</sup>                  | [34]      |
| PFOA                  | 0.0414                                    | 575                | 77                                       | He               | None          | pseudo-1st             | 0.0380 min <sup>-1</sup>                  | [34]      |
| PFOA                  | 0.0414                                    | 575                | 77                                       | N2               | None          | pseudo-1st             | 0.0210 min <sup>-1</sup>                  | [34]      |
| PFOA                  | 0.0414                                    | 575                | 77                                       | Ar               | None          | pseudo-1st             | 0.0145 min <sup>-1</sup>                  | [34]      |
| PFOA                  | 0.0414                                    | 575                | 77                                       | O2               | None          | pseudo-1st             | 0.0050 min <sup>-1</sup>                  | [34]      |
| PFOA                  | 0.0414                                    | 575                | 77                                       | O3               | None          | pseudo-1st             | 0.0035 min <sup>-1</sup>                  | [34]      |
| PFOS                  | 1.3                                       | 1000               | 10.9                                     | Ar               | None          | 0th <sub>F</sub>       | 0.30 μmol L <sup>-1</sup> h <sup>-1</sup> | [11]      |
| PFOS                  | 1.3                                       | 1000               | 10.9                                     | Ar               | None          | 0th <sub>S</sub> O4    | 0.19 μmol L <sup>-1</sup> h <sup>-1</sup> | [11]      |
| PFOS                  | 1.3                                       | 500                | 13.2                                     | Ar               | None          | 0th <sub>F</sub>       | 0.32 μmol L <sup>-1</sup> h <sup>-1</sup> | [11]      |
| PFOS                  | 1.3                                       | 500                | 13.2                                     | Ar               | None          | 0th <sub>S</sub> O4    | 0.32 μmol L <sup>-1</sup> h <sup>-1</sup> | [11]      |
| PFOS                  | 1.3                                       | 500+1000           | 24.1                                     | Ar               | None          | 0th <sub>F</sub>       | 0.82 μmol L <sup>-1</sup> h <sup>-1</sup> | [11]      |
| PFOS                  | 1.3                                       | 500+1000           | 24.1                                     | Ar               | None          | 0th <sub>S</sub> O4    | 0.61 μmol L <sup>-1</sup> h <sup>-1</sup> | [11]      |
| PFOA                  | 54.7                                      | 40                 | 180                                      | Air              | None          | pseudo-1st             | 0.0035 min <sup>-1</sup>                  | [14]      |
| PFOA                  | 54.7                                      | 40                 | 180                                      | Air              | MnO4<br>(2mM) | pseudo-1st             | 0.0061 min <sup>-1</sup>                  | [14]      |

Continued on next page

Table S7 – Continued from previous page

| PFAS<br>Com-<br>pound | Initial<br>Conc.<br>(mg L <sup>-1</sup> ) | Frequency<br>(kHz) | Power<br>Density<br>(W L <sup>-1</sup> ) | Dissolved<br>Gas | Additive       | Rate<br>Const.<br>Type | Rate Const.                                       | Reference |
|-----------------------|-------------------------------------------|--------------------|------------------------------------------|------------------|----------------|------------------------|---------------------------------------------------|-----------|
| PFOA                  | 54.7                                      | 40                 | 180                                      | Air              | MnO4<br>(6mM)  | pseudo-1st             | 0.0130 min <sup>-1</sup>                          | [14]      |
| PFOA                  | 54.7                                      | 40                 | 180                                      | Air              | MnO4<br>(10mM) | pseudo-1st             | 0.0125 min <sup>-1</sup>                          | [14]      |
| PFOA                  | 54.7                                      | 40                 | 180                                      | O2               | MnO4<br>(6mM)  | pseudo-1st             | 0.0095 min <sup>-1</sup>                          | [14]      |
| PFOA                  | 54.7                                      | 40                 | 180                                      | Ar               | MnO4<br>(6mM)  | pseudo-1st             | 0.0140 min <sup>-1</sup>                          | [14]      |
| PFOA                  | 54.7                                      | 40                 | 180                                      | Air              | None           | 0th <sub>F</sub>       | 0.0015<br>mmol L <sup>-1</sup> min <sup>-1</sup>  | [14]      |
| PFOA                  | 54.7                                      | 40                 | 180                                      | Air              | MnO4<br>(6mM)  | 0th <sub>F</sub>       | 0.0079<br>mmol L <sup>-1</sup> min <sup>-1</sup>  | [14]      |
| PFOA                  | 54.7                                      | 40                 | 60                                       | Air              | None           | pseudo-1st             | 0.0025 min <sup>-1</sup>                          | [14]      |
| PFOA                  | 54.7                                      | 40                 | 120                                      | Air              | None           | pseudo-1st             | 0.0031 min <sup>-1</sup>                          | [14]      |
| PFEEs                 | 62.4                                      | 500                | 250                                      | Ar               | -              | 0th <sub>F</sub>       | 3.9E-03<br>mmol L <sup>-1</sup> min <sup>-1</sup> | [9]       |

Continued on next page

Table S7 – Continued from previous page

| PFAS<br>Com-<br>pound | Initial<br>Conc.<br>(mg L <sup>-1</sup> ) | Frequency<br>(kHz) | Power<br>Density<br>(W L <sup>-1</sup> ) | Dissolved<br>Gas | Additive | Rate<br>Const.<br>Type | Rate Const.                                       | Reference |
|-----------------------|-------------------------------------------|--------------------|------------------------------------------|------------------|----------|------------------------|---------------------------------------------------|-----------|
| PFBS                  | 56.7                                      | 500                | 250                                      | Ar               | -        | 0th <sub>F</sub>       | 1.8E-03<br>mmol L <sup>-1</sup> min <sup>-1</sup> | [9]       |
| PFHxS                 | 48.2                                      | 500                | 250                                      | Ar               | -        | 0th <sub>F</sub>       | 2.6E-03<br>mmol L <sup>-1</sup> min <sup>-1</sup> | [9]       |
| PFOS                  | 42.5                                      | 500                | 250                                      | Ar               | -        | 0th <sub>F</sub>       | 3.5E-03<br>mmol L <sup>-1</sup> min <sup>-1</sup> | [9]       |
| 6:2 FTS               | 55.9                                      | 500                | 250                                      | Ar               | -        | 0th <sub>F</sub>       | 1.5E-03<br>mmol L <sup>-1</sup> min <sup>-1</sup> | [9]       |
| PFPrA                 | 55.8                                      | 500                | 250                                      | Ar               | -        | 0th <sub>F</sub>       | 1.6E-03<br>mmol L <sup>-1</sup> min <sup>-1</sup> | [9]       |
| PFPeA                 | 49.8                                      | 500                | 250                                      | Ar               | -        | 0th <sub>F</sub>       | 2.5E-03<br>mmol L <sup>-1</sup> min <sup>-1</sup> | [9]       |
| PFHxA                 | 47.3                                      | 500                | 250                                      | Ar               | -        | 0th <sub>F</sub>       | 3.5E-03<br>mmol L <sup>-1</sup> min <sup>-1</sup> | [9]       |
| PFOA                  | 46.9                                      | 500                | 250                                      | Ar               | -        | 0th <sub>F</sub>       | 3.7E-03<br>mmol L <sup>-1</sup> min <sup>-1</sup> | [9]       |
| PFEEs                 | 62.4                                      | 500                | 250                                      | Ar               | -        | pseudo-1st             | 0.055 min <sup>-1</sup>                           | [9]       |

Continued on next page

Table S7 – Continued from previous page

| PFAS<br>Com-<br>pound | Initial<br>Conc.<br>(mg L <sup>-1</sup> ) | Frequency<br>(kHz) | Power<br>Density<br>(W L <sup>-1</sup> ) | Dissolved<br>Gas | Additive | Rate<br>Const.<br>Type | Rate Const.                                 | Reference |
|-----------------------|-------------------------------------------|--------------------|------------------------------------------|------------------|----------|------------------------|---------------------------------------------|-----------|
| PFBS                  | 56.7                                      | 500                | 250                                      | Ar               | -        | pseudo-1st             | 0.019 min <sup>-1</sup>                     | [9]       |
| PFHxS                 | 48.2                                      | 500                | 250                                      | Ar               | -        | pseudo-1st             | 0.034 min <sup>-1</sup>                     | [9]       |
| PFOS                  | 42.5                                      | 500                | 250                                      | Ar               | -        | pseudo-1st             | 0.051 min <sup>-1</sup>                     | [9]       |
| PFOA                  | 46.9                                      | 500                | 250                                      | Ar               | -        | pseudo-1st             | 0.046 min <sup>-1</sup>                     | [9]       |
| PFOA                  | 20.70                                     | 640                | 792                                      | Ar               | None     | 0th <sub>F</sub>       | 0.62 μmol L <sup>-1</sup> min <sup>-1</sup> | [13]      |
| HFPO-DA               | 16.50                                     | 640                | 792                                      | Ar               | None     | 0th <sub>F</sub>       | 0.65 μmol L <sup>-1</sup> min <sup>-1</sup> | [13]      |
| PFHpA                 | 18.20                                     | 640                | 792                                      | Ar               | None     | 0th <sub>F</sub>       | 0.60 μmol L <sup>-1</sup> min <sup>-1</sup> | [13]      |
| PFHxA                 | 15.70                                     | 640                | 792                                      | Ar               | None     | 0th <sub>F</sub>       | 0.44 μmol L <sup>-1</sup> min <sup>-1</sup> | [13]      |
| PFPeA                 | 13.20                                     | 640                | 792                                      | Ar               | None     | 0th <sub>F</sub>       | 0.23 μmol L <sup>-1</sup> min <sup>-1</sup> | [13]      |
| PFBA                  | 10.70                                     | 640                | 792                                      | Ar               | None     | 0th <sub>F</sub>       | 0.08 μmol L <sup>-1</sup> min <sup>-1</sup> | [13]      |
| PFOS                  | 25.01                                     | 640                | 792                                      | Ar               | None     | 0th <sub>F</sub>       | 0.61 μmol L <sup>-1</sup> min <sup>-1</sup> | [13]      |
| HFPO-TrA              | 24.81                                     | 640                | 792                                      | Ar               | None     | 0th <sub>F</sub>       | 0.81 μmol L <sup>-1</sup> min <sup>-1</sup> | [13]      |
| HFPO-<br>TeA          | 33.11                                     | 640                | 792                                      | Ar               | None     | 0th <sub>F</sub>       | 0.94 μmol L <sup>-1</sup> min <sup>-1</sup> | [13]      |
| PFECA-B               | 14.80                                     | 640                | 792                                      | Ar               | None     | 0th <sub>F</sub>       | 0.17 μmol L <sup>-1</sup> min <sup>-1</sup> | [13]      |
| PFOA                  | 20.70                                     | 640                | 792                                      | He               | None     | 0th <sub>F</sub>       | 0.44 μmol L <sup>-1</sup> min <sup>-1</sup> | [13]      |
| PFOA                  | 20.70                                     | 640                | 792                                      | Air              | None     | 0th <sub>F</sub>       | 0.35 μmol L <sup>-1</sup> min <sup>-1</sup> | [13]      |

Continued on next page

Table S7 – Continued from previous page

| PFAS<br>Com-<br>pound | Initial<br>Conc.<br>(mg L <sup>-1</sup> ) | Frequency<br>(kHz) | Power<br>Density<br>(W L <sup>-1</sup> ) | Dissolved<br>Gas | Additive | Rate<br>Const.<br>Type | Rate Const.                            | Reference |
|-----------------------|-------------------------------------------|--------------------|------------------------------------------|------------------|----------|------------------------|----------------------------------------|-----------|
| PFOS                  | 5.0                                       | 500                | 400                                      | Air              | None     | pseudo-1st             | 0.0310 min <sup>-1</sup>               | [31]      |
| PFOS                  | 5.0                                       | 500                | 267                                      | Air              | None     | pseudo-1st             | 0.0180 min <sup>-1</sup>               | [31]      |
| PFOS                  | 3.0                                       | 500                | 267                                      | Air              | None     | pseudo-1st             | 0.0220 min <sup>-1</sup>               | [31]      |
| PFOS                  | 1.0                                       | 500                | 267                                      | Air              | None     | pseudo-1st             | 0.0200 min <sup>-1</sup>               | [31]      |
| PFOS                  | 0.1                                       | 500                | 267                                      | Air              | None     | pseudo-1st             | 0.0110 min <sup>-1</sup>               | [31]      |
| PFOS                  | 0.002                                     | 500                | 267                                      | Air              | None     | pseudo-1st             | 0.0100 min <sup>-1</sup>               | [31]      |
| PFOS                  | 5.0                                       | 22                 | 400                                      | Air              | None     | pseudo-1st             | 0.0001 min <sup>-1</sup>               | [31]      |
| PFOS                  | 5.0                                       | 500                | 400                                      | Air              | None     | 0th <sub>F</sub>       | 0.0034                                 | [31]      |
|                       |                                           |                    |                                          |                  |          |                        | mmol L <sup>-1</sup> min <sup>-1</sup> |           |
| PFOA                  | 10.0                                      | 20                 | 375                                      | Air              | None     | pseudo-1st             | 0.0460 min <sup>-1</sup>               | [32]      |
| PFOS                  | 10.0                                      | 20                 | 375                                      | Air              | None     | pseudo-1st             | 0.0520 min <sup>-1</sup>               | [32]      |
| PFOA                  | 10.0                                      | 20                 | 300                                      | Air              | None     | pseudo-1st             | 0.0380 min <sup>-1</sup>               | [32]      |
| PFOS                  | 10.0                                      | 20                 | 300                                      | Air              | None     | pseudo-1st             | 0.0430 min <sup>-1</sup>               | [32]      |
| PFOA                  | 10.0                                      | 20                 | 225                                      | Air              | None     | pseudo-1st             | 0.0260 min <sup>-1</sup>               | [32]      |
| PFOS                  | 10.0                                      | 20                 | 225                                      | Air              | None     | pseudo-1st             | 0.0310 min <sup>-1</sup>               | [32]      |
| PFOA                  | 10.0                                      | 20                 | 150                                      | Air              | None     | pseudo-1st             | 0.0150 min <sup>-1</sup>               | [32]      |
| PFOS                  | 10.0                                      | 20                 | 150                                      | Air              | None     | pseudo-1st             | 0.0210 min <sup>-1</sup>               | [32]      |

Continued on next page

Table S7 – Continued from previous page

| PFAS<br>Com-<br>pound | Initial<br>Conc.<br>(mg L <sup>-1</sup> ) | Frequency<br>(kHz) | Power<br>Density<br>(W L <sup>-1</sup> ) | Dissolved<br>Gas | Additive | Rate<br>Const.<br>Type | Rate Const.                                  | Reference |
|-----------------------|-------------------------------------------|--------------------|------------------------------------------|------------------|----------|------------------------|----------------------------------------------|-----------|
| PFOA                  | 20.0                                      | 20                 | 3750                                     | Air              | None     | pseudo-1st             | 0.0230 min <sup>-1</sup>                     | [32]      |
| PFOS                  | 20.0                                      | 20                 | 375                                      | Air              | None     | pseudo-1st             | 0.0290 min <sup>-1</sup>                     | [32]      |
| PFOA                  | 5.0                                       | 20                 | 375                                      | Air              | None     | pseudo-1st             | 0.0510 min <sup>-1</sup>                     | [32]      |
| PFOS                  | 5.0                                       | 20                 | 375                                      | Air              | None     | pseudo-1st             | 0.0590 min <sup>-1</sup>                     | [32]      |
| PFOA                  | 0.5                                       | 20                 | 18000                                    | Air              | None     | 0th_F                  | 0.14 μmin <sup>-1</sup>                      | [47]      |
| PFOA                  | 1.0                                       | 580                | 750                                      | Air              | None     | pseudo-1st             | 4.20 × 10 <sup>-2</sup> min <sup>-1</sup>    | [1]       |
| PFOS                  | 1.0                                       | 580                | 750                                      | Air              | None     | pseudo-1st             | 2.40 × 10 <sup>-2</sup> min <sup>-1</sup>    | [1]       |
| PFOA                  | 1.0                                       | 575                | 77                                       | Air              | None     | pseudo-1st             | 7.63 × 10 <sup>-3</sup> min <sup>-1</sup>    | [37]      |
| PFOS                  | 1.25                                      | 575                | 77                                       | Air              | None     | pseudo-1st             | 5.17 × 10 <sup>-3</sup> min <sup>-1</sup>    | [37]      |
| PFOA                  | 20.0                                      | 575                | 77                                       | Air              | None     | 0th                    | 0.050 μmol L <sup>-1</sup> min <sup>-1</sup> | [37]      |
| PFOS                  | 20.0                                      | 575                | 77                                       | Air              | None     | 0th                    | 0.076 μmol L <sup>-1</sup> min <sup>-1</sup> | [37]      |
| PFOA                  | 10.0                                      | 575                | 77                                       | Air              | None     | 0th                    | 0.021 μmol L <sup>-1</sup> min <sup>-1</sup> | [37]      |
| (Mixture)             |                                           |                    |                                          |                  |          |                        |                                              |           |
| PFOS                  | 10.0                                      | 575                | 77                                       | Air              | None     | 0th <sub>F</sub>       | 0.052 μmol L <sup>-1</sup> min <sup>-1</sup> | [37]      |
| (Mixture)             |                                           |                    |                                          |                  |          |                        |                                              |           |
| PFOS                  | 3.0                                       | 700+950            | 78.4                                     | Air              | None     | pseudo-1st             | 1.4 × 10 <sup>-3</sup> min <sup>-1</sup>     | [18]      |
| PFOA                  | 3.0                                       | 700+950            | 78.4                                     | Air              | None     | pseudo-1st             | 1.2 × 10 <sup>-3</sup> min <sup>-1</sup>     | [18]      |

Continued on next page

Table S7 – Continued from previous page

| PFAS<br>Com-<br>pound          | Initial<br>Conc.<br>(mg L <sup>-1</sup> ) | Frequency<br>(kHz) | Power<br>Density<br>(W L <sup>-1</sup> ) | Dissolved<br>Gas | Additive          | Rate<br>Const.<br>Type | Rate Const.                                  | Reference |
|--------------------------------|-------------------------------------------|--------------------|------------------------------------------|------------------|-------------------|------------------------|----------------------------------------------|-----------|
| PFAS<br>(Mixture) <sup>b</sup> | 18.0                                      | 700                | 78.4                                     | Air              | None              | 0th_F                  | 0.24 μmol L <sup>-1</sup> min <sup>-1</sup>  | [18]      |
| PFAS<br>(Mixture) <sup>b</sup> | 18.0                                      | 950                | 78.4                                     | Air              | None              | 0th_F                  | 0.23 μmol L <sup>-1</sup> min <sup>-1</sup>  | [18]      |
| PFAS<br>(Mixture) <sup>b</sup> | 18.0                                      | 700+950            | 78.4                                     | Air              | None              | 0th_F                  | 0.36 μmol L <sup>-1</sup> min <sup>-1</sup>  | [18]      |
| PFOS                           | 10.0                                      | 410                | 200                                      | Air              | None (No<br>Flow) | 0th_F                  | 2.20 μmol L <sup>-1</sup> min <sup>-1</sup>  | [38]      |
| PFOS                           | 10.0                                      | 410                | 200                                      | Air              | -                 | 0th_F                  | 2.45 μmol L <sup>-1</sup> min <sup>-1</sup>  | [38]      |
| PFOS                           | 10.0                                      | 410                | 200                                      | Air              | -                 | 0th_F                  | 2.51 μmol L <sup>-1</sup> min <sup>-1</sup>  | [38]      |
| PFOS                           | 10.0                                      | 410                | 200                                      | Air              | -                 | 0th_F                  | 2.20 μmol L <sup>-1</sup> min <sup>-1</sup>  | [38]      |
| PFOS                           | 10.0                                      | 410                | 200                                      | Air              | -                 | 0th_F                  | 2.35 μmol L <sup>-1</sup> min <sup>-1</sup>  | [38]      |
| PFOS                           | 10.0                                      | 410                | 100                                      | Air              | - Flow            | 0th_F                  | 1.137 μmol L <sup>-1</sup> min <sup>-1</sup> | [39]      |
| PFOS                           | 10.0                                      | 410                | 200                                      | Air              | -                 | 0th_F                  | 3.402 μmol L <sup>-1</sup> min <sup>-1</sup> | [39]      |
| PFOS                           | 10.0                                      | 410                | 300                                      | Air              | -                 | 0th_F                  | 2.715 μmol L <sup>-1</sup> min <sup>-1</sup> | [39]      |
| AFFF<br>(Mixture) <sup>a</sup> | 20x Dil.                                  | 410                | 270                                      | Air              | -                 | 0th_F                  | 4.280 μmol L <sup>-1</sup> min <sup>-1</sup> | [39]      |

Continued on next page

Table S7 – Continued from previous page

| PFAS<br>Com-<br>pound          | Initial<br>Conc.<br>(mg L <sup>-1</sup> ) | Frequency<br>(kHz) | Power<br>Density<br>(W L <sup>-1</sup> ) | Dissolved<br>Gas | Additive         | Rate<br>Const.<br>Type | Rate Const.              | Reference |
|--------------------------------|-------------------------------------------|--------------------|------------------------------------------|------------------|------------------|------------------------|--------------------------|-----------|
| PFOA                           | 1.0                                       | 130                | 51.1                                     | Air              | Glass<br>Reactor | pseudo-1st             | 0.98 h <sup>-1</sup>     | [19]      |
| PFOA                           | 1.0                                       | 130                | 55.1                                     | Air              | PP<br>Reactor    | pseudo-1st             | 0.22 h <sup>-1</sup>     | [19]      |
| PFOA                           | 1.0                                       | 130                | 51.1                                     | Air              | Glass<br>Reactor | 0th_F                  | 2.6 h <sup>-1</sup>      | [19]      |
| PFOA                           | 1.0                                       | 130                | 55.1                                     | Air              | PP<br>Reactor    | 0th_F                  | 1.4 h <sup>-1</sup>      | [19]      |
| PFOS                           | 1.0                                       | 130                | 51.1                                     | Air              | Glass<br>Reactor | 0th_F                  | 1.2 h <sup>-1</sup>      | [19]      |
| 6:2 FTS                        | 1.0                                       | 130                | 51.1                                     | Air              | Glass<br>Reactor | 0th_F                  | 2.1 h <sup>-1</sup>      | [19]      |
| AFFF<br>(Mixture) <sup>a</sup> | 1000x<br>Dil.                             | 130                | 51.1                                     | Air              | Glass<br>Reactor | % Defluor.             | 100% (3.0 h)             | [19]      |
| PFOA                           | 10.0                                      | 130                | 51.1                                     | Air              | MQ Water         | pseudo-1st             | 0.0160 min <sup>-1</sup> | [2]       |
| PFOA                           | 10.0                                      | 130                | 51.1                                     | Air              | Creek<br>Water   | pseudo-1st             | 0.0084 min <sup>-1</sup> | [2]       |

Continued on next page

Table S7 – Continued from previous page

| PFAS Compound | Initial Conc. (mg L <sup>-1</sup> ) | Frequency (kHz) | Power Density (W L <sup>-1</sup> ) | Dissolved Gas | Additive        | Rate Const. Type | Rate Const.              | Reference |
|---------------|-------------------------------------|-----------------|------------------------------------|---------------|-----------------|------------------|--------------------------|-----------|
| PFOA          | 10.0                                | 130             | 51.1                               | Air           | Seawater        | pseudo-1st       | 0.0062 min <sup>-1</sup> | [2]       |
| PFOS          | 10.0                                | 130             | 51.1                               | Air           | MQ Water        | pseudo-1st       | 0.0275 min <sup>-1</sup> | [2]       |
| PFOS          | 10.0                                | 130             | 51.1                               | Air           | Creek Water     | pseudo-1st       | 0.0232 min <sup>-1</sup> | [2]       |
| PFOS          | 10.0                                | 130             | 51.1                               | Air           | Seawater        | pseudo-1st       | 0.0162 min <sup>-1</sup> | [2]       |
| PFOA          | 10.0                                | 130             | 51.1                               | Air           | MQ Water        | pseudo-1st_F     | 0.0160 min <sup>-1</sup> | [2]       |
| PFOA          | 10.0                                | 130             | 51.1                               | Air           | Seawater        | pseudo-1st_F     | 0.0030 min <sup>-1</sup> | [2]       |
| PFOS          | 10.0                                | 130             | 51.1                               | Air           | MQ Water        | pseudo-1st_F     | 0.0080 min <sup>-1</sup> | [2]       |
| PFOS          | 10.0                                | 130             | 51.1                               | Air           | Seawater        | pseudo-1st_F     | 0.0004 min <sup>-1</sup> | [2]       |
| PFBA (C4)     | 0.05                                | 575             | 144                                | Air           | Mixture, pH 5.6 | pseudo-1st       | 0.003 min <sup>-1</sup>  | [36]      |
| PFPeA (C5)    | 0.05                                | 575             | 144                                | Air           | Mixture, pH 5.6 | pseudo-1st       | 0.008 min <sup>-1</sup>  | [36]      |

Continued on next page

Table S7 – *Continued from previous page*

| <b>PFAS<br/>Com-<br/>pound</b> | <b>Initial<br/>Conc.<br/>(mg L<sup>-1</sup>)</b> | <b>Frequency<br/>(kHz)</b> | <b>Power<br/>Density<br/>(W L<sup>-1</sup>)</b> | <b>Dissolved<br/>Gas</b> | <b>Additive</b>    | <b>Rate<br/>Const.<br/>Type</b> | <b>Rate Const.</b>      | <b>Reference</b> |
|--------------------------------|--------------------------------------------------|----------------------------|-------------------------------------------------|--------------------------|--------------------|---------------------------------|-------------------------|------------------|
| PFHxA<br>(C6)                  | 0.04                                             | 575                        | 144                                             | Air                      | Mixture,<br>pH 5.6 | pseudo-1st                      | 0.010 min <sup>-1</sup> | [36]             |
| PFHpA<br>(C7)                  | 0.04                                             | 575                        | 144                                             | Air                      | Mixture,<br>pH 5.6 | pseudo-1st                      | 0.006 min <sup>-1</sup> | [36]             |
| PFOA<br>(C8)                   | 0.05                                             | 575                        | 144                                             | Air                      | Mixture,<br>pH 5.6 | pseudo-1st                      | 0.019 min <sup>-1</sup> | [36]             |
| PFNA<br>(C9)                   | 0.05                                             | 575                        | 144                                             | Air                      | Mixture,<br>pH 5.6 | pseudo-1st                      | 0.022 min <sup>-1</sup> | [36]             |
| PFDA<br>(C10)                  | 0.05                                             | 575                        | 144                                             | Air                      | Mixture,<br>pH 5.6 | pseudo-1st                      | 0.021 min <sup>-1</sup> | [36]             |
| PFUnDA<br>(C11)                | 0.025                                            | 575                        | 144                                             | Air                      | Mixture,<br>pH 5.6 | pseudo-1st                      | 0.018 min <sup>-1</sup> | [36]             |
| PFDoDA<br>(C12)                | 0.018                                            | 575                        | 144                                             | Air                      | Mixture,<br>pH 5.6 | pseudo-1st                      | 0.011 min <sup>-1</sup> | [36]             |
| PFTTrDA<br>(C13)               | 0.019                                            | 575                        | 144                                             | Air                      | Mixture,<br>pH 5.6 | pseudo-1st                      | 0.010 min <sup>-1</sup> | [36]             |

*Continued on next page*

Table S7 – *Continued from previous page*

| <b>PFAS<br/>Com-<br/>pound</b> | <b>Initial<br/>Conc.<br/>(mg L<sup>-1</sup>)</b> | <b>Frequency<br/>(kHz)</b> | <b>Power<br/>Density<br/>(W L<sup>-1</sup>)</b> | <b>Dissolved<br/>Gas</b> | <b>Additive</b>    | <b>Rate<br/>Const.<br/>Type</b> | <b>Rate Const.</b>       | <b>Reference</b> |
|--------------------------------|--------------------------------------------------|----------------------------|-------------------------------------------------|--------------------------|--------------------|---------------------------------|--------------------------|------------------|
| PFTeDA<br>(C14)                | 0.03                                             | 575                        | 144                                             | Air                      | Mixture,<br>pH 5.6 | pseudo-1st                      | 0.011 min <sup>-1</sup>  | [36]             |
| PFHxS<br>(C6S)                 | 0.03                                             | 575                        | 144                                             | Air                      | Mixture,<br>pH 5.6 | pseudo-1st                      | 0.007 min <sup>-1</sup>  | [36]             |
| PFOS<br>(C8S)                  | 0.05                                             | 575                        | 144                                             | Air                      | Mixture,<br>pH 5.6 | pseudo-1st                      | 0.007 min <sup>-1</sup>  | [36]             |
| PFBA<br>(C4)                   | 0.05                                             | 853                        | 144                                             | Air                      | None               | pseudo-1st                      | 0.0020 min <sup>-1</sup> | [36]             |
| PFPeA<br>(C5)                  | 0.05                                             | 853                        | 144                                             | Air                      | None               | pseudo-1st                      | 0.0040 min <sup>-1</sup> | [36]             |
| PFHxA<br>(C6)                  | 0.05                                             | 853                        | 144                                             | Air                      | None               | pseudo-1st                      | 0.0075 min <sup>-1</sup> | [36]             |
| PFHpA<br>(C7)                  | 0.05                                             | 853                        | 144                                             | Air                      | None               | pseudo-1st                      | 0.0050 min <sup>-1</sup> | [36]             |
| PFOA<br>(C8)                   | 0.05                                             | 853                        | 144                                             | Air                      | None               | pseudo-1st                      | 0.0090 min <sup>-1</sup> | [36]             |

*Continued on next page*

Table S7 – *Continued from previous page*

| <b>PFAS<br/>Com-<br/>pound</b> | <b>Initial<br/>Conc.<br/>(mg L<sup>-1</sup>)</b> | <b>Frequency<br/>(kHz)</b> | <b>Power<br/>Density<br/>(W L<sup>-1</sup>)</b> | <b>Dissolved<br/>Gas</b> | <b>Additive</b> | <b>Rate<br/>Const.<br/>Type</b> | <b>Rate Const.</b>       | <b>Reference</b> |
|--------------------------------|--------------------------------------------------|----------------------------|-------------------------------------------------|--------------------------|-----------------|---------------------------------|--------------------------|------------------|
| PFNA<br>(C9)                   | 0.05                                             | 853                        | 144                                             | Air                      | None            | pseudo-1st                      | 0.0105 min <sup>-1</sup> | [36]             |
| PFDA<br>(C10)                  | 0.05                                             | 853                        | 144                                             | Air                      | None            | pseudo-1st                      | 0.0090 min <sup>-1</sup> | [36]             |
| PFUnDA<br>(C11)                | 0.05                                             | 853                        | 144                                             | Air                      | None            | pseudo-1st                      | 0.0105 min <sup>-1</sup> | [36]             |
| PFDDA<br>(C12)                 | 0.05                                             | 853                        | 144                                             | Air                      | None            | pseudo-1st                      | 0.0055 min <sup>-1</sup> | [36]             |
| PFTTrDA<br>(C13)               | 0.05                                             | 853                        | 144                                             | Air                      | None            | pseudo-1st                      | 0.0030 min <sup>-1</sup> | [36]             |
| PFTeDA<br>(C14)                | 0.05                                             | 853                        | 144                                             | Air                      | None            | pseudo-1st                      | 0.0030 min <sup>-1</sup> | [36]             |
| PFHxS<br>(CS6)                 | 0.05                                             | 853                        | 144                                             | Air                      | None            | pseudo-1st                      | 0.0065 min <sup>-1</sup> | [36]             |
| PFOS<br>(CS8)                  | 0.05                                             | 853                        | 144                                             | Air                      | None            | pseudo-1st                      | 0.0040 min <sup>-1</sup> | [36]             |

*Continued on next page*

Table S7 – *Continued from previous page*

| <b>PFAS<br/>Com-<br/>pound</b> | <b>Initial<br/>Conc.<br/>(mg L<sup>-1</sup>)</b> | <b>Frequency<br/>(kHz)</b> | <b>Power<br/>Density<br/>(W L<sup>-1</sup>)</b> | <b>Dissolved<br/>Gas</b> | <b>Additive</b> | <b>Rate<br/>Const.<br/>Type</b> | <b>Rate Const.</b>       | <b>Reference</b> |
|--------------------------------|--------------------------------------------------|----------------------------|-------------------------------------------------|--------------------------|-----------------|---------------------------------|--------------------------|------------------|
| PFBA<br>(C4)                   | 0.05                                             | 1132                       | 144                                             | Air                      | None            | pseudo-1st                      | 0.0015 min <sup>-1</sup> | [36]             |
| PFPeA<br>(C5)                  | 0.05                                             | 1132                       | 144                                             | Air                      | None            | pseudo-1st                      | 0.0030 min <sup>-1</sup> | [36]             |
| PFHxA<br>(C6)                  | 0.05                                             | 1132                       | 144                                             | Air                      | None            | pseudo-1st                      | 0.0035 min <sup>-1</sup> | [36]             |
| PFHpA<br>(C7)                  | 0.05                                             | 1132                       | 144                                             | Air                      | None            | pseudo-1st                      | 0.0025 min <sup>-1</sup> | [36]             |
| PFOA<br>(C8)                   | 0.05                                             | 1132                       | 144                                             | Air                      | None            | pseudo-1st                      | 0.0080 min <sup>-1</sup> | [36]             |
| PFNA<br>(C9)                   | 0.05                                             | 1132                       | 144                                             | Air                      | None            | pseudo-1st                      | 0.0120 min <sup>-1</sup> | [36]             |
| PFDA<br>(C10)                  | 0.05                                             | 1132                       | 144                                             | Air                      | None            | pseudo-1st                      | 0.0115 min <sup>-1</sup> | [36]             |
| PFUnDA<br>(C11)                | 0.05                                             | 1132                       | 144                                             | Air                      | None            | pseudo-1st                      | 0.0130 min <sup>-1</sup> | [36]             |

*Continued on next page*

Table S7 – *Continued from previous page*

| <b>PFAS<br/>Com-<br/>pound</b> | <b>Initial<br/>Conc.<br/>(mg L<sup>-1</sup>)</b> | <b>Frequency<br/>(kHz)</b> | <b>Power<br/>Density<br/>(W L<sup>-1</sup>)</b> | <b>Dissolved<br/>Gas</b> | <b>Additive</b> | <b>Rate<br/>Const.<br/>Type</b> | <b>Rate Const.</b>       | <b>Reference</b> |
|--------------------------------|--------------------------------------------------|----------------------------|-------------------------------------------------|--------------------------|-----------------|---------------------------------|--------------------------|------------------|
| PFDDA<br>(C12)                 | 0.05                                             | 1132                       | 144                                             | Air                      | None            | pseudo-1st                      | 0.0095 min <sup>-1</sup> | [36]             |
| PFTTrDA<br>(C13)               | 0.05                                             | 1132                       | 144                                             | Air                      | None            | pseudo-1st                      | 0.0065 min <sup>-1</sup> | [36]             |
| PFTeDA<br>(C14)                | 0.05                                             | 1132                       | 144                                             | Air                      | None            | pseudo-1st                      | 0.0065 min <sup>-1</sup> | [36]             |
| PFHxS<br>(CS6)                 | 0.05                                             | 1132                       | 144                                             | Air                      | None            | pseudo-1st                      | 0.0025 min <sup>-1</sup> | [36]             |
| PFOS<br>(CS8)                  | 0.05                                             | 1132                       | 144                                             | Air                      | None            | pseudo-1st                      | 0.0035 min <sup>-1</sup> | [36]             |
| PFBA<br>(C4)                   | 0.05                                             | 575                        | 50                                              | Air                      | None            | pseudo-1st                      | 0.0020 min <sup>-1</sup> | [36]             |
| PFPeA<br>(C5)                  | 0.05                                             | 575                        | 50                                              | Air                      | None            | pseudo-1st                      | 0.0040 min <sup>-1</sup> | [36]             |
| PFHxA<br>(C6)                  | 0.04                                             | 575                        | 50                                              | Air                      | None            | pseudo-1st                      | 0.0030 min <sup>-1</sup> | [36]             |

*Continued on next page*

Table S7 – *Continued from previous page*

| <b>PFAS<br/>Com-<br/>pound</b> | <b>Initial<br/>Conc.<br/>(mg L<sup>-1</sup>)</b> | <b>Frequency<br/>(kHz)</b> | <b>Power<br/>Density<br/>(W L<sup>-1</sup>)</b> | <b>Dissolved<br/>Gas</b> | <b>Additive</b> | <b>Rate<br/>Const.<br/>Type</b> | <b>Rate Const.</b>       | <b>Reference</b> |
|--------------------------------|--------------------------------------------------|----------------------------|-------------------------------------------------|--------------------------|-----------------|---------------------------------|--------------------------|------------------|
| PFHpA<br>(C7)                  | 0.04                                             | 575                        | 50                                              | Air                      | None            | pseudo-1st                      | 0.0080 min <sup>-1</sup> | [36]             |
| PFOA<br>(C8)                   | 0.05                                             | 575                        | 50                                              | Air                      | None            | pseudo-1st                      | 0.0070 min <sup>-1</sup> | [36]             |
| PFNA<br>(C9)                   | 0.05                                             | 575                        | 50                                              | Air                      | None            | pseudo-1st                      | 0.0055 min <sup>-1</sup> | [36]             |
| PFDA<br>(C10)                  | 0.05                                             | 575                        | 50                                              | Air                      | None            | pseudo-1st                      | 0.0060 min <sup>-1</sup> | [36]             |
| PFUnDA<br>(C11)                | 0.025                                            | 575                        | 50                                              | Air                      | None            | pseudo-1st                      | 0.0065 min <sup>-1</sup> | [36]             |
| PFDDA<br>(C12)                 | 0.018                                            | 575                        | 50                                              | Air                      | None            | pseudo-1st                      | 0.0035 min <sup>-1</sup> | [36]             |
| PFTTrDA<br>(C13)               | 0.019                                            | 575                        | 50                                              | Air                      | None            | pseudo-1st                      | 0.0010 min <sup>-1</sup> | [36]             |
| PFTeDA<br>(C14)                | 0.031                                            | 575                        | 50                                              | Air                      | None            | pseudo-1st                      | 0.0010 min <sup>-1</sup> | [36]             |

*Continued on next page*

Table S7 – *Continued from previous page*

| <b>PFAS<br/>Com-<br/>pound</b> | <b>Initial<br/>Conc.<br/>(mg L<sup>-1</sup>)</b> | <b>Frequency<br/>(kHz)</b> | <b>Power<br/>Density<br/>(W L<sup>-1</sup>)</b> | <b>Dissolved<br/>Gas</b> | <b>Additive</b> | <b>Rate<br/>Const.<br/>Type</b> | <b>Rate Const.</b>       | <b>Reference</b> |
|--------------------------------|--------------------------------------------------|----------------------------|-------------------------------------------------|--------------------------|-----------------|---------------------------------|--------------------------|------------------|
| PFHxS<br>(C6)                  | 0.03                                             | 575                        | 50                                              | Air                      | None            | pseudo-1st                      | 0.0080 min <sup>-1</sup> | [36]             |
| PFOS<br>(C8)                   | 0.05                                             | 575                        | 50                                              | Air                      | None            | pseudo-1st                      | 0.0030 min <sup>-1</sup> | [36]             |
| PFBA<br>(C4)                   | 0.050                                            | 575                        | 252                                             | Air                      | None            | pseudo-1st                      | 0.0110 min <sup>-1</sup> | [36]             |
| PFPeA<br>(C5)                  | 0.050                                            | 575                        | 252                                             | Air                      | None            | pseudo-1st                      | 0.0240 min <sup>-1</sup> | [36]             |
| PFHxA<br>(C6)                  | 0.040                                            | 575                        | 252                                             | Air                      | None            | pseudo-1st                      | 0.0270 min <sup>-1</sup> | [36]             |
| PFHpA<br>(C7)                  | 0.041                                            | 575                        | 252                                             | Air                      | None            | pseudo-1st                      | 0.0190 min <sup>-1</sup> | [36]             |
| PFOA<br>(C8)                   | 0.051                                            | 575                        | 252                                             | Air                      | None            | pseudo-1st                      | 0.0320 min <sup>-1</sup> | [36]             |
| PFNA<br>(C9)                   | 0.053                                            | 575                        | 252                                             | Air                      | None            | pseudo-1st                      | 0.0330 min <sup>-1</sup> | [36]             |

*Continued on next page*

Table S7 – *Continued from previous page*

| <b>PFAS<br/>Com-<br/>pound</b> | <b>Initial<br/>Conc.<br/>(mg L<sup>-1</sup>)</b> | <b>Frequency<br/>(kHz)</b> | <b>Power<br/>Density<br/>(W L<sup>-1</sup>)</b> | <b>Dissolved<br/>Gas</b> | <b>Additive</b> | <b>Rate<br/>Const.<br/>Type</b> | <b>Rate Const.</b>       | <b>Reference</b> |
|--------------------------------|--------------------------------------------------|----------------------------|-------------------------------------------------|--------------------------|-----------------|---------------------------------|--------------------------|------------------|
| PFDA<br>(C10)                  | 0.052                                            | 575                        | 252                                             | Air                      | None            | pseudo-1st                      | 0.0310 min <sup>-1</sup> | [36]             |
| PFUnDA<br>(C11)                | 0.025                                            | 575                        | 252                                             | Air                      | None            | pseudo-1st                      | 0.0240 min <sup>-1</sup> | [36]             |
| PFDDA<br>(C12)                 | 0.018                                            | 575                        | 252                                             | Air                      | None            | pseudo-1st                      | 0.0200 min <sup>-1</sup> | [36]             |
| PFTriDA<br>(C13)               | 0.019                                            | 575                        | 252                                             | Air                      | None            | pseudo-1st                      | 0.0200 min <sup>-1</sup> | [36]             |
| PFTeDA<br>(C14)                | 0.031                                            | 575                        | 252                                             | Air                      | None            | pseudo-1st                      | 0.0170 min <sup>-1</sup> | [36]             |
| PFHxS<br>(CS6)                 | 0.030                                            | 575                        | 252                                             | Air                      | None            | pseudo-1st                      | 0.0195 min <sup>-1</sup> | [36]             |
| PFOS<br>(CS8)                  | 0.051                                            | 575                        | 252                                             | Air                      | None            | pseudo-1st                      | 0.0215 min <sup>-1</sup> | [36]             |
| PFBA<br>(C4)                   | 0.050                                            | 575                        | 144                                             | Air                      | None            | pseudo-1st                      | 0.0100 min <sup>-1</sup> | [36]             |

*Continued on next page*

Table S7 – *Continued from previous page*

| <b>PFAS<br/>Com-<br/>pound</b> | <b>Initial<br/>Conc.<br/>(mg L<sup>-1</sup>)</b> | <b>Frequency<br/>(kHz)</b> | <b>Power<br/>Density<br/>(W L<sup>-1</sup>)</b> | <b>Dissolved<br/>Gas</b> | <b>Additive</b> | <b>Rate<br/>Const.<br/>Type</b> | <b>Rate Const.</b>       | <b>Reference</b> |
|--------------------------------|--------------------------------------------------|----------------------------|-------------------------------------------------|--------------------------|-----------------|---------------------------------|--------------------------|------------------|
| PFPeA<br>(C5)                  | 0.050                                            | 575                        | 144                                             | Air                      | None            | pseudo-1st                      | 0.0260 min <sup>-1</sup> | [36]             |
| PFHxA<br>(C6)                  | 0.040                                            | 575                        | 144                                             | Air                      | None            | pseudo-1st                      | 0.0270 min <sup>-1</sup> | [36]             |
| PFHpA<br>(C7)                  | 0.041                                            | 575                        | 144                                             | Air                      | None            | pseudo-1st                      | 0.0180 min <sup>-1</sup> | [36]             |
| PFOA<br>(C8)                   | 0.051                                            | 575                        | 144                                             | Air                      | None            | pseudo-1st                      | 0.0310 min <sup>-1</sup> | [36]             |
| PFNA<br>(C9)                   | 0.053                                            | 575                        | 144                                             | Air                      | None            | pseudo-1st                      | 0.0400 min <sup>-1</sup> | [36]             |
| PFDA<br>(C10)                  | 0.052                                            | 575                        | 144                                             | Air                      | None            | pseudo-1st                      | 0.0350 min <sup>-1</sup> | [36]             |
| PFUnDA<br>(C11)                | 0.025                                            | 575                        | 144                                             | Air                      | None            | pseudo-1st                      | 0.0225 min <sup>-1</sup> | [36]             |
| PFDDA<br>(C12)                 | 0.018                                            | 575                        | 144                                             | Air                      | None            | pseudo-1st                      | 0.0100 min <sup>-1</sup> | [36]             |

*Continued on next page*

Table S7 – Continued from previous page

| <b>PFAS<br/>Com-<br/>pound</b> | <b>Initial<br/>Conc.<br/>(mg L<sup>-1</sup>)</b> | <b>Frequency<br/>(kHz)</b> | <b>Power<br/>Density<br/>(W L<sup>-1</sup>)</b> | <b>Dissolved<br/>Gas</b> | <b>Additive</b> | <b>Rate<br/>Const.<br/>Type</b> | <b>Rate Const.</b>       | <b>Reference</b> |
|--------------------------------|--------------------------------------------------|----------------------------|-------------------------------------------------|--------------------------|-----------------|---------------------------------|--------------------------|------------------|
| PFTTrDA<br>(C13)               | 0.019                                            | 575                        | 144                                             | Air                      | None            | pseudo-1st                      | 0.0060 min <sup>-1</sup> | [36]             |
| PFTeDA<br>(C14)                | 0.031                                            | 575                        | 144                                             | Air                      | None            | pseudo-1st                      | 0.0035 min <sup>-1</sup> | [36]             |
| PFHxS<br>(CS6)                 | 0.030                                            | 575                        | 144                                             | Air                      | None            | pseudo-1st                      | 0.0180 min <sup>-1</sup> | [36]             |
| PFOS<br>(CS8)                  | 0.051                                            | 575                        | 144                                             | Air                      | None            | pseudo-1st                      | 0.0130 min <sup>-1</sup> | [36]             |
| 6:2 FTS                        | 0.5                                              | 850/950                    | 118                                             | Air                      | Groundwater     | pseudo-1st                      | 0.1682 min <sup>-1</sup> | [28]             |
| PFBA                           | 0.5                                              | 850/950                    | 118                                             | Air                      | Groundwater     | pseudo-1st                      | 0.1698 min <sup>-1</sup> | [28]             |
| PFBS                           | 0.5                                              | 850/950                    | 118                                             | Air                      | Groundwater     | pseudo-1st                      | 0.3727 min <sup>-1</sup> | [28]             |
| PFHpA                          | 0.5                                              | 850/950                    | 118                                             | Air                      | Groundwater     | pseudo-1st                      | 0.3186 min <sup>-1</sup> | [28]             |
| PFHxS                          | 0.5                                              | 850/950                    | 118                                             | Air                      | Groundwater     | pseudo-1st                      | 0.5518 min <sup>-1</sup> | [28]             |
| PFOA                           | 0.5                                              | 850/950                    | 118                                             | Air                      | Groundwater     | pseudo-1st                      | 0.4289 min <sup>-1</sup> | [28]             |
| PFPeA                          | 0.5                                              | 850/950                    | 118                                             | Air                      | Groundwater     | pseudo-1st                      | 0.4524 min <sup>-1</sup> | [28]             |
| PFPeS                          | 0.5                                              | 850/950                    | 118                                             | Air                      | Groundwater     | pseudo-1st                      | 0.4110 min <sup>-1</sup> | [28]             |
| PFBS                           | 42.0                                             | 850/950                    | 118                                             | Air                      | AFFF            | pseudo-1st                      | 0.0187 min <sup>-1</sup> | [28]             |

Continued on next page

Table S7 – Continued from previous page

| PFAS<br>Com-<br>pound | Initial<br>Conc.<br>(mg L <sup>-1</sup> ) | Frequency<br>(kHz) | Power<br>Density<br>(W L <sup>-1</sup> ) | Dissolved<br>Gas | Additive        | Rate<br>Const.<br>Type | Rate Const.              | Reference |
|-----------------------|-------------------------------------------|--------------------|------------------------------------------|------------------|-----------------|------------------------|--------------------------|-----------|
| PFHpS                 | 42.0                                      | 850/950            | 118                                      | Air              | AFFF            | pseudo-1st             | 0.0231 min <sup>-1</sup> | [28]      |
| PFHxA                 | 42.0                                      | 850/950            | 118                                      | Air              | AFFF            | pseudo-1st             | 0.0013 min <sup>-1</sup> | [28]      |
| PFHxS                 | 42.0                                      | 850/950            | 118                                      | Air              | AFFF            | pseudo-1st             | 0.0090 min <sup>-1</sup> | [28]      |
| PFOS                  | 42.0                                      | 850/950            | 118                                      | Air              | AFFF            | pseudo-1st             | 0.0130 min <sup>-1</sup> | [28]      |
| PFPeS                 | 42.0                                      | 850/950            | 118                                      | Air              | AFFF            | pseudo-1st             | 0.0192 min <sup>-1</sup> | [28]      |
| PFBS                  | 18.0                                      | 850/950            | 118                                      | Air              | Still<br>Bottom | pseudo-1st             | 0.0896 min <sup>-1</sup> | [28]      |
| PFHpA                 | 18.0                                      | 850/950            | 118                                      | Air              | Still<br>Bottom | pseudo-1st             | 0.0628 min <sup>-1</sup> | [28]      |
| PFHxA                 | 18.0                                      | 850/950            | 118                                      | Air              | Still<br>Bottom | pseudo-1st             | 0.1358 min <sup>-1</sup> | [28]      |
| PFHxS                 | 18.0                                      | 850/950            | 118                                      | Air              | Still<br>Bottom | pseudo-1st             | 0.0457 min <sup>-1</sup> | [28]      |
| PFOA                  | 18.0                                      | 850/950            | 118                                      | Air              | Still<br>Bottom | pseudo-1st             | 0.0959 min <sup>-1</sup> | [28]      |
| PFOS                  | 18.0                                      | 850/950            | 118                                      | Air              | Still<br>Bottom | pseudo-1st             | 0.1254 min <sup>-1</sup> | [28]      |

Continued on next page

Table S7 – Continued from previous page

| PFAS<br>Com-<br>pound | Initial<br>Conc.<br>(mg L <sup>-1</sup> ) | Frequency<br>(kHz) | Power<br>Density<br>(W L <sup>-1</sup> ) | Dissolved<br>Gas | Additive         | Rate<br>Const.<br>Type | Rate Const.                            | Reference |
|-----------------------|-------------------------------------------|--------------------|------------------------------------------|------------------|------------------|------------------------|----------------------------------------|-----------|
| PFPeS                 | 18.0                                      | 850/950            | 118                                      | Air              | Still<br>Bottom  | pseudo-1st             | 0.0738 min <sup>-1</sup>               | [28]      |
| 4:2 FTS               | 4.54                                      | 20                 | 120                                      | Argon            | 5mM<br>Phosphate | pseudo-1st             | 0.0152 min <sup>-1</sup>               | [8]       |
| 6:2 FTS               | 5.54                                      | 20                 | 120                                      | Argon            | 5mM<br>Phosphate | pseudo-1st             | 0.0336 min <sup>-1</sup>               | [8]       |
| 8:2 FTS               | 6.54                                      | 20                 | 120                                      | Argon            | 5mM<br>Phosphate | pseudo-1st             | 0.0528 min <sup>-1</sup>               | [8]       |
| PFOA                  | 14.0                                      | 700                | 100                                      | Air              | None             | pseudo-1st             | $9 \times 10^{-3}$ min <sup>-1</sup>   | [17]      |
| PFOS                  | 11.4                                      | 700                | 100                                      | Air              | None             | pseudo-1st             | $4 \times 10^{-3}$ min <sup>-1</sup>   | [17]      |
| PFOA                  | 24.0                                      | 700                | 100                                      | Air              | None             | pseudo-1st             | $1.2 \times 10^{-3}$ min <sup>-1</sup> | [17]      |
| PFOA                  | 24.0                                      | 700                | 150                                      | Air              | None             | pseudo-1st             | $2.1 \times 10^{-3}$ min <sup>-1</sup> | [17]      |
| PFOA                  | 24.0                                      | 700                | 200                                      | Air              | None             | pseudo-1st             | $3.1 \times 10^{-3}$ min <sup>-1</sup> | [17]      |
| PFOS                  | 20.0                                      | 700                | 100                                      | Air              | None             | pseudo-1st             | $1.1 \times 10^{-3}$ min <sup>-1</sup> | [17]      |
| PFOS                  | 20.0                                      | 700                | 150                                      | Air              | None             | pseudo-1st             | $2.4 \times 10^{-3}$ min <sup>-1</sup> | [17]      |
| PFOS                  | 20.0                                      | 700                | 200                                      | Air              | None             | pseudo-1st             | $3.2 \times 10^{-3}$ min <sup>-1</sup> | [17]      |

Continued on next page

Table S7 – Continued from previous page

| PFAS<br>Com-<br>pound | Initial<br>Conc.<br>(mg L <sup>-1</sup> ) | Frequency<br>(kHz) | Power<br>Density<br>(W L <sup>-1</sup> ) | Dissolved<br>Gas | Additive                | Rate<br>Const.<br>Type | Rate Const.                            | Reference |
|-----------------------|-------------------------------------------|--------------------|------------------------------------------|------------------|-------------------------|------------------------|----------------------------------------|-----------|
| PFOA                  | 10                                        | 20 + 43            | 800                                      | N/A              | Persulfate<br>(1.0 g/L) | pseudo-1st             | 22.2 h <sup>-1</sup> min <sup>-1</sup> | [23]      |
| PFOS                  | 5.79                                      | 20 + 43            | 800                                      | N/A              | Persulfate<br>(1.0 g/L) | pseudo-1st             | 19.2 h <sup>-1</sup> min <sup>-1</sup> | [23]      |
| 6:2 FTS               | 10                                        | 20 + 43            | 800                                      | N/A              | Persulfate<br>(1.0 g/L) | pseudo-1st             | 20.8 h <sup>-1</sup> min <sup>-1</sup> | [23]      |
| PFOA<br>(HFUS)        | 10                                        | 43                 | 250                                      | N/A              | None                    | pseudo-1st             | 0.71 h <sup>-1</sup> min <sup>-1</sup> | [23]      |
| PFOA<br>(HFUS/PS)     | 10                                        | 43                 | 250                                      | N/A              | Persulfate<br>(1.0 g/L) | pseudo-1st             | 0.86 h <sup>-1</sup> min <sup>-1</sup> | [23]      |
| GenX                  | 1.0                                       | 375                | 400                                      | N/A              | None                    | pseudo-1st             | 0.0280 min <sup>-1</sup>               | [15]      |
| GenX                  | 1.0                                       | 580                | 400                                      | N/A              | None                    | pseudo-1st             | 0.0501 min <sup>-1</sup>               | [15]      |
| GenX                  | 1.0                                       | 860                | 400                                      | N/A              | None                    | pseudo-1st             | 0.0175 min <sup>-1</sup>               | [15]      |
| GenX                  | 1.0                                       | 1140               | 400                                      | N/A              | None                    | pseudo-1st             | 0.0075 min <sup>-1</sup>               | [15]      |
| PFOA                  | 1.0                                       | 375                | 400                                      | N/A              | None                    | pseudo-1st             | 0.0155 min <sup>-1</sup>               | [15]      |
| PFOA                  | 1.0                                       | 580                | 400                                      | N/A              | None                    | pseudo-1st             | 0.0444 min <sup>-1</sup>               | [15]      |
| PFOA                  | 1.0                                       | 860                | 400                                      | N/A              | None                    | pseudo-1st             | 0.0163 min <sup>-1</sup>               | [15]      |

Continued on next page

Table S7 – Continued from previous page

| PFAS<br>Com-<br>pound | Initial<br>Conc.<br>(mg L <sup>-1</sup> ) | Frequency<br>(kHz) | Power<br>Density<br>(W L <sup>-1</sup> ) | Dissolved<br>Gas | Additive      | Rate<br>Const.<br>Type | Rate Const.                              | Reference |
|-----------------------|-------------------------------------------|--------------------|------------------------------------------|------------------|---------------|------------------------|------------------------------------------|-----------|
| PFOA                  | 1.0                                       | 1140               | 400                                      | N/A              | None          | pseudo-1st             | 0.0102 min <sup>-1</sup>                 | [15]      |
| PFOS                  | 1.0                                       | 375                | 400                                      | N/A              | None          | pseudo-1st             | 0.0113 min <sup>-1</sup>                 | [15]      |
| PFOS                  | 1.0                                       | 580                | 400                                      | N/A              | None          | pseudo-1st             | 0.0153 min <sup>-1</sup>                 | [15]      |
| PFOS                  | 1.0                                       | 860                | 400                                      | N/A              | None          | pseudo-1st             | 0.0051 min <sup>-1</sup>                 | [15]      |
| PFOS                  | 1.0                                       | 1140               | 400                                      | N/A              | None          | pseudo-1st             | 0.0039 min <sup>-1</sup>                 | [15]      |
| PFOA                  | 140                                       | 700                | 1250                                     | Argon            | DI Water      | pseudo-1st             | 37 × 10 <sup>-3</sup> min <sup>-1</sup>  | [16]      |
| PFOA                  | 12.3                                      | 700                | 1040                                     | Argon            | Low TDS<br>GW | pseudo-1st             | 35 × 10 <sup>-3</sup> min <sup>-1</sup>  | [16]      |
| PFOS                  | 2.9                                       | 700                | 1250                                     | Argon            | DI Water      | pseudo-1st             | 16 × 10 <sup>-3</sup> min <sup>-1</sup>  | [16]      |
| PFOS                  | 10.4                                      | 700                | 1250                                     | Argon            | Low TDS<br>GW | pseudo-1st             | 7.2 × 10 <sup>-3</sup> min <sup>-1</sup> | [16]      |
| PFBS                  | 10.5                                      | 700                | 1250                                     | Argon            | DI Water      | pseudo-1st             | 10 × 10 <sup>-3</sup> min <sup>-1</sup>  | [16]      |
| PFBS                  | 7.5                                       | 700                | 1250                                     | Argon            | Low TDS<br>GW | pseudo-1st             | 21 × 10 <sup>-3</sup> min <sup>-1</sup>  | [16]      |
| 6:2 FTS               | 5.1                                       | 700                | 1250                                     | Argon            | DI Water      | pseudo-1st             | 18 × 10 <sup>-3</sup> min <sup>-1</sup>  | [16]      |
| 6:2 FTS               | 6.1                                       | 700                | 1250                                     | Argon            | Low TDS<br>GW | pseudo-1st             | 32 × 10 <sup>-3</sup> min <sup>-1</sup>  | [16]      |

Continued on next page

Table S7 – Continued from previous page

| PFAS<br>Com-<br>pound | Initial<br>Conc.<br>(mg L <sup>-1</sup> ) | Frequency<br>(kHz) | Power<br>Density<br>(W L <sup>-1</sup> ) | Dissolved<br>Gas | Additive | Rate<br>Const.<br>Type | Rate Const.                           | Reference |
|-----------------------|-------------------------------------------|--------------------|------------------------------------------|------------------|----------|------------------------|---------------------------------------|-----------|
| HFPO-DA               | 867                                       | 700                | 1250                                     | Argon            | DI Water | pseudo-1st             | $32 \times 10^{-3} \text{ min}^{-1}$  | [16]      |
| 6:2 FTAB              | 7.2                                       | 700                | 1250                                     | Argon            | DI Water | pseudo-1st             | $27 \times 10^{-3} \text{ min}^{-1}$  | [16]      |
| FOSA                  | 0.2                                       | 700                | 1250                                     | Argon            | DI Water | pseudo-1st             | $15 \times 10^{-3} \text{ min}^{-1}$  | [16]      |
| PFOA                  | 0.7                                       | 700 +<br>950       | 145                                      | N/A              | None     | Pseudo-1st             | $8.9 \times 10^{-3} \text{ min}^{-1}$ | [26]      |
| PFOS                  | 0.5                                       | 700 +<br>950       | 145                                      | N/A              | None     | Pseudo-1st             | $1.0 \times 10^{-3} \text{ min}^{-1}$ | [26]      |
| PFHxA                 | 0.8                                       | 700 +<br>950       | 145                                      | N/A              | None     | Pseudo-1st             | $5.6 \times 10^{-3} \text{ min}^{-1}$ | [26]      |
| PFHxS                 | 1.1                                       | 700 +<br>950       | 145                                      | N/A              | None     | Pseudo-1st             | $5.9 \times 10^{-3} \text{ min}^{-1}$ | [26]      |
| PFBA                  | 2.0                                       | 700 +<br>950       | 145                                      | N/A              | None     | Pseudo-1st             | $3.9 \times 10^{-3} \text{ min}^{-1}$ | [26]      |
| PFBS                  | 1.6                                       | 700 +<br>950       | 145                                      | N/A              | None     | Pseudo-1st             | $5.8 \times 10^{-3} \text{ min}^{-1}$ | [26]      |
| PFOA                  | 19.0                                      | 700 +<br>950       | 145                                      | N/A              | None     | Pseudo-1st             | $0.6 \times 10^{-3} \text{ min}^{-1}$ | [26]      |

Continued on next page

Table S7 – Continued from previous page

| PFAS<br>Com-<br>pound | Initial<br>Conc.<br>(mg L <sup>-1</sup> ) | Frequency<br>(kHz) | Power<br>Density<br>(W L <sup>-1</sup> ) | Dissolved<br>Gas | Additive | Rate<br>Const.<br>Type | Rate Const.                           | Reference |
|-----------------------|-------------------------------------------|--------------------|------------------------------------------|------------------|----------|------------------------|---------------------------------------|-----------|
| PFOS                  | 23.0                                      | 700 +<br>950       | 145                                      | N/A              | None     | Pseudo-1st             | $0.5 \times 10^{-3} \text{min}^{-1}$  | [26]      |
| PFHpA                 | 10.0                                      | 1000               | 70                                       | Air              | None     | pseudo-1st             | $5.35 \times 10^{-3} \text{min}^{-1}$ | [10]      |
| PFOA                  | 10.0                                      | 1000               | 70                                       | Air              | None     | pseudo-1st             | $5.80 \times 10^{-3} \text{min}^{-1}$ | [10]      |
| PFNA                  | 10.0                                      | 1000               | 70                                       | Air              | None     | pseudo-1st             | $7.20 \times 10^{-3} \text{min}^{-1}$ | [10]      |
| PFHxS                 | 10.0                                      | 1000               | 70                                       | Air              | None     | pseudo-1st             | $9.83 \times 10^{-4} \text{min}^{-1}$ | [10]      |
| PFOS                  | 10.0                                      | 1000               | 70                                       | Air              | None     | pseudo-1st             | $2.22 \times 10^{-3} \text{min}^{-1}$ | [10]      |
| PFHpA                 | 10.0                                      | 500/1000           | 70                                       | Air              | None     | pseudo-1st             | $2.95 \times 10^{-3} \text{min}^{-1}$ | [10]      |
| PFOA                  | 10.0                                      | 500/1000           | 70                                       | Air              | None     | pseudo-1st             | $2.77 \times 10^{-3} \text{min}^{-1}$ | [10]      |
| PFNA                  | 10.0                                      | 500/1000           | 70                                       | Air              | None     | pseudo-1st             | $3.43 \times 10^{-3} \text{min}^{-1}$ | [10]      |
| PFHpA                 | 10.0                                      | 500                | 70                                       | Air              | None     | pseudo-1st             | $7.67 \times 10^{-4} \text{min}^{-1}$ | [10]      |
| PFOA                  | 10.0                                      | 500                | 70                                       | Air              | None     | pseudo-1st             | $6.83 \times 10^{-4} \text{min}^{-1}$ | [10]      |
| PFNA                  | 10.0                                      | 500                | 70                                       | Air              | None     | pseudo-1st             | $7.50 \times 10^{-4} \text{min}^{-1}$ | [10]      |
| PFHxS                 | 10.0                                      | 500                | 70                                       | Air              | None     | pseudo-1st             | $2.83 \times 10^{-4} \text{min}^{-1}$ | [10]      |
| PFOS                  | 10.0                                      | 500                | 70                                       | Air              | None     | pseudo-1st             | $2.50 \times 10^{-4} \text{min}^{-1}$ | [10]      |
| PFCA Mix              | 10.0                                      | 1000               | 70                                       | Air              | None     | pseudo-1st             | $6.07 \times 10^{-3} \text{min}^{-1}$ | [10]      |

Continued on next page

Table S7 – *Continued from previous page*

| <b>PFAS<br/>Com-<br/>pound</b> | <b>Initial<br/>Conc.<br/>(mg L<sup>-1</sup>)</b> | <b>Frequency<br/>(kHz)</b> | <b>Power<br/>Density<br/>(W L<sup>-1</sup>)</b> | <b>Dissolved<br/>Gas</b> | <b>Additive</b>                | <b>Rate<br/>Const.<br/>Type</b> | <b>Rate Const.</b>                     | <b>Reference</b> |
|--------------------------------|--------------------------------------------------|----------------------------|-------------------------------------------------|--------------------------|--------------------------------|---------------------------------|----------------------------------------|------------------|
| PFCA Mix                       | 10.0                                             | 1000                       | 70                                              | Air                      | NH <sub>4</sub> Cl (10<br>g/L) | pseudo-1st                      | $4.50 \times 10^{-4} \text{ min}^{-1}$ | [10]             |
| PFCA Mix                       | 10.0                                             | 1000                       | 70                                              | Air                      | NaCl (10<br>g/L)               | pseudo-1st                      | $1.47 \times 10^{-3} \text{ min}^{-1}$ | [10]             |
| PFCA Mix                       | 10.0                                             | 1000                       | 70                                              | Air                      | NaOH (5<br>g/L)                | pseudo-1st                      | $1.33 \times 10^{-3} \text{ min}^{-1}$ | [10]             |
| PFCA Mix                       | 10.0                                             | 500/1000                   | 70                                              | Air                      | None                           | pseudo-1st                      | $3.03 \times 10^{-3} \text{ min}^{-1}$ | [10]             |
| PFCA Mix                       | 10.0                                             | 500/1000                   | 70                                              | Air                      | NH <sub>4</sub> Cl (10<br>g/L) | pseudo-1st                      | $4.00 \times 10^{-4} \text{ min}^{-1}$ | [10]             |
| PFCA Mix                       | 10.0                                             | 500/1000                   | 70                                              | Air                      | NaCl (10<br>g/L)               | pseudo-1st                      | $1.65 \times 10^{-3} \text{ min}^{-1}$ | [10]             |
| PFCA Mix                       | 10.0                                             | 500/1000                   | 70                                              | Air                      | NaOH (5<br>g/L)                | pseudo-1st                      | $8.67 \times 10^{-4} \text{ min}^{-1}$ | [10]             |
| PFCA Mix                       | 10.0                                             | 500                        | 70                                              | Air                      | None                           | pseudo-1st                      | $7.17 \times 10^{-4} \text{ min}^{-1}$ | [10]             |
| PFCA Mix                       | 10.0                                             | 500                        | 70                                              | Air                      | NH <sub>4</sub> Cl (10<br>g/L) | pseudo-1st                      | $4.00 \times 10^{-4} \text{ min}^{-1}$ | [10]             |

*Continued on next page*

Table S7 – *Continued from previous page*

| <b>PFAS<br/>Com-<br/>pound</b> | <b>Initial<br/>Conc.<br/>(mg L<sup>-1</sup>)</b> | <b>Frequency<br/>(kHz)</b> | <b>Power<br/>Density<br/>(W L<sup>-1</sup>)</b> | <b>Dissolved<br/>Gas</b> | <b>Additive</b>                | <b>Rate<br/>Const.<br/>Type</b> | <b>Rate Const.</b>                     | <b>Reference</b> |
|--------------------------------|--------------------------------------------------|----------------------------|-------------------------------------------------|--------------------------|--------------------------------|---------------------------------|----------------------------------------|------------------|
| PFCA Mix                       | 10.0                                             | 500                        | 70                                              | Air                      | NaCl (10<br>g/L)               | pseudo-1st                      | $1.05 \times 10^{-3} \text{ min}^{-1}$ | [10]             |
| PFCA Mix                       | 10.0                                             | 500                        | 70                                              | Air                      | NaOH (5<br>g/L)                | pseudo-1st                      | $8.17 \times 10^{-4} \text{ min}^{-1}$ | [10]             |
| PFSA Mix                       | 10.0                                             | 1000                       | 70                                              | Air                      | None                           | pseudo-1st                      | $1.48 \times 10^{-3} \text{ min}^{-1}$ | [10]             |
| PFSA Mix                       | 10.0                                             | 1000                       | 70                                              | Air                      | NH <sub>4</sub> Cl (10<br>g/L) | pseudo-1st                      | $6.50 \times 10^{-4} \text{ min}^{-1}$ | [10]             |
| PFSA Mix                       | 10.0                                             | 1000                       | 70                                              | Air                      | NaCl (10<br>g/L)               | pseudo-1st                      | $8.50 \times 10^{-4} \text{ min}^{-1}$ | [10]             |
| PFSA Mix                       | 10.0                                             | 1000                       | 70                                              | Air                      | NaOH (5<br>g/L)                | pseudo-1st                      | $3.50 \times 10^{-4} \text{ min}^{-1}$ | [10]             |
| PFSA Mix                       | 10.0                                             | 500                        | 70                                              | Air                      | None                           | pseudo-1st                      | $2.67 \times 10^{-4} \text{ min}^{-1}$ | [10]             |
| PFSA Mix                       | 10.0                                             | 500                        | 70                                              | Air                      | NH <sub>4</sub> Cl (10<br>g/L) | pseudo-1st                      | $5.50 \times 10^{-4} \text{ min}^{-1}$ | [10]             |
| PFSA Mix                       | 10.0                                             | 500                        | 70                                              | Air                      | NaCl (10<br>g/L)               | pseudo-1st                      | $5.33 \times 10^{-4} \text{ min}^{-1}$ | [10]             |

*Continued on next page*

Table S7 – Continued from previous page

| PFAS<br>Com-<br>pound | Initial<br>Conc.<br>(mg L <sup>-1</sup> ) | Frequency<br>(kHz) | Power<br>Density<br>(W L <sup>-1</sup> ) | Dissolved<br>Gas | Additive                       | Rate<br>Const.<br>Type | Rate Const.                            | Reference |
|-----------------------|-------------------------------------------|--------------------|------------------------------------------|------------------|--------------------------------|------------------------|----------------------------------------|-----------|
| PFSA Mix              | 10.0                                      | 500                | 70                                       | Air              | NaOH (5<br>g/L)                | pseudo-1st             | $5.67 \times 10^{-4} \text{ min}^{-1}$ | [10]      |
| PFHpA                 | 10.0                                      | 1000               | 70                                       | Air              | Artif.<br>spent brine<br>(AXB) | pseudo-1st             | $1.97 \times 10^{-3} \text{ min}^{-1}$ | [10]      |
| PFOA                  | 10.0                                      | 1000               | 70                                       | Air              | Artif.<br>spent brine<br>(AXB) | pseudo-1st             | $1.22 \times 10^{-3} \text{ min}^{-1}$ | [10]      |
| PFNA                  | 10.0                                      | 1000               | 70                                       | Air              | Artif.<br>spent brine<br>(AXB) | pseudo-1st             | $9.83 \times 10^{-4} \text{ min}^{-1}$ | [10]      |
| PFHxS                 | 10.0                                      | 1000               | 70                                       | Air              | Artif.<br>spent brine<br>(AXB) | pseudo-1st             | $6.17 \times 10^{-4} \text{ min}^{-1}$ | [10]      |
| PFOS                  | 10.0                                      | 1000               | 70                                       | Air              | Artif.<br>spent brine<br>(AXB) | pseudo-1st             | $3.83 \times 10^{-4} \text{ min}^{-1}$ | [10]      |

Continued on next page

Table S7 – Continued from previous page

| PFAS<br>Com-<br>pound | Initial<br>Conc.<br>(mg L <sup>-1</sup> ) | Frequency<br>(kHz) | Power<br>Density<br>(W L <sup>-1</sup> ) | Dissolved<br>Gas | Additive                        | Rate<br>Const.<br>Type | Rate Const.                            | Reference |
|-----------------------|-------------------------------------------|--------------------|------------------------------------------|------------------|---------------------------------|------------------------|----------------------------------------|-----------|
| PFHpA                 | 10.0                                      | 1000               | 70                                       | Air              | Artif. still<br>bottoms<br>(SB) | pseudo-1st             | $2.33 \times 10^{-3} \text{ min}^{-1}$ | [10]      |
| PFOA                  | 10.0                                      | 1000               | 70                                       | Air              | Artif. still<br>bottoms<br>(SB) | pseudo-1st             | $1.45 \times 10^{-3} \text{ min}^{-1}$ | [10]      |
| PFNA                  | 10.0                                      | 1000               | 70                                       | Air              | Artif. still<br>bottoms<br>(SB) | pseudo-1st             | $1.25 \times 10^{-3} \text{ min}^{-1}$ | [10]      |
| PFHxS                 | 10.0                                      | 1000               | 70                                       | Air              | Artif. still<br>bottoms<br>(SB) | pseudo-1st             | $7.00 \times 10^{-4} \text{ min}^{-1}$ | [10]      |
| PFOS                  | 10.0                                      | 1000               | 70                                       | Air              | Artif. still<br>bottoms<br>(SB) | pseudo-1st             | $4.83 \times 10^{-4} \text{ min}^{-1}$ | [10]      |

Continued on next page

Table S7 – Continued from previous page

| PFAS<br>Com-<br>pound | Initial<br>Conc.<br>(mg L <sup>-1</sup> ) | Frequency<br>(kHz) | Power<br>Density<br>(W L <sup>-1</sup> ) | Dissolved<br>Gas | Additive                         | Rate<br>Const.<br>Type | Rate Const.                            | Reference |
|-----------------------|-------------------------------------------|--------------------|------------------------------------------|------------------|----------------------------------|------------------------|----------------------------------------|-----------|
| PFHpA                 | 10.0                                      | 1000               | 70                                       | Air              | SB +<br>MeOH (50<br>g/kg)        | pseudo-1st             | $1.27 \times 10^{-3} \text{ min}^{-1}$ | [10]      |
| PFOA                  | 10.0                                      | 1000               | 70                                       | Air              | SB +<br>MeOH (50<br>g/kg)        | pseudo-1st             | $8.83 \times 10^{-4} \text{ min}^{-1}$ | [10]      |
| PFNA                  | 10.0                                      | 1000               | 70                                       | Air              | SB +<br>MeOH (50<br>g/kg)        | pseudo-1st             | $7.67 \times 10^{-4} \text{ min}^{-1}$ | [10]      |
| PFHxS                 | 10.0                                      | 1000               | 70                                       | Air              | SB +<br>MeOH (50<br>g/kg)        | pseudo-1st             | $3.00 \times 10^{-4} \text{ min}^{-1}$ | [10]      |
| PFOS                  | 10.0                                      | 1000               | 70                                       | Air              | SB +<br>MeOH (50<br>g/kg)        | pseudo-1st             | $2.33 \times 10^{-4} \text{ min}^{-1}$ | [10]      |
| PFHpA                 | 10.0                                      | 1000               | 70                                       | Air              | SB (3.6<br>g/L Cl <sup>-</sup> ) | pseudo-1st             | $1.47 \times 10^{-3} \text{ min}^{-1}$ | [10]      |

Continued on next page

Table S7 – Continued from previous page

| PFAS<br>Com-<br>pound | Initial<br>Conc.<br>(mg L <sup>-1</sup> ) | Frequency<br>(kHz) | Power<br>Density<br>(W L <sup>-1</sup> ) | Dissolved<br>Gas | Additive                         | Rate<br>Const.<br>Type | Rate Const.                            | Reference |
|-----------------------|-------------------------------------------|--------------------|------------------------------------------|------------------|----------------------------------|------------------------|----------------------------------------|-----------|
| PFOA                  | 10.0                                      | 1000               | 70                                       | Air              | SB (3.6<br>g/L Cl <sup>-</sup> ) | pseudo-1st             | $9.33 \times 10^{-4} \text{ min}^{-1}$ | [10]      |
| PFNA                  | 10.0                                      | 1000               | 70                                       | Air              | SB (3.6<br>g/L Cl <sup>-</sup> ) | pseudo-1st             | $8.00 \times 10^{-4} \text{ min}^{-1}$ | [10]      |
| PFHxS                 | 10.0                                      | 1000               | 70                                       | Air              | SB (3.6<br>g/L Cl <sup>-</sup> ) | pseudo-1st             | $3.67 \times 10^{-4} \text{ min}^{-1}$ | [10]      |
| PFOS                  | 10.0                                      | 1000               | 70                                       | Air              | SB (3.6<br>g/L Cl <sup>-</sup> ) | pseudo-1st             | $2.50 \times 10^{-4} \text{ min}^{-1}$ | [10]      |
| PFHpA                 | 10.0                                      | 1000               | 70                                       | Air              | SB (36 g/L<br>Cl <sup>-</sup> )  | pseudo-1st             | $1.70 \times 10^{-3} \text{ min}^{-1}$ | [10]      |
| PFOA                  | 10.0                                      | 1000               | 70                                       | Air              | SB (36 g/L<br>Cl <sup>-</sup> )  | pseudo-1st             | $1.33 \times 10^{-3} \text{ min}^{-1}$ | [10]      |
| PFNA                  | 10.0                                      | 1000               | 70                                       | Air              | SB (36 g/L<br>Cl <sup>-</sup> )  | pseudo-1st             | $1.30 \times 10^{-3} \text{ min}^{-1}$ | [10]      |
| PFHxS                 | 10.0                                      | 1000               | 70                                       | Air              | SB (36 g/L<br>Cl <sup>-</sup> )  | pseudo-1st             | $5.00 \times 10^{-4} \text{ min}^{-1}$ | [10]      |

Continued on next page

Table S7 – Continued from previous page

| PFAS<br>Com-<br>pound | Initial<br>Conc.<br>(mg L <sup>-1</sup> ) | Frequency<br>(kHz) | Power<br>Density<br>(W L <sup>-1</sup> ) | Dissolved<br>Gas | Additive                        | Rate<br>Const.<br>Type | Rate Const.                            | Reference |
|-----------------------|-------------------------------------------|--------------------|------------------------------------------|------------------|---------------------------------|------------------------|----------------------------------------|-----------|
| PFOS                  | 10.0                                      | 1000               | 70                                       | Air              | SB (36 g/L<br>Cl <sup>-</sup> ) | pseudo-1st             | $6.83 \times 10^{-4} \text{ min}^{-1}$ | [10]      |
| PFHpA                 | 10.0                                      | 1000               | 70                                       | Air              | SB (72 g/L<br>Cl <sup>-</sup> ) | pseudo-1st             | $2.90 \times 10^{-3} \text{ min}^{-1}$ | [10]      |
| PFOA                  | 10.0                                      | 1000               | 70                                       | Air              | SB (72 g/L<br>Cl <sup>-</sup> ) | pseudo-1st             | $1.83 \times 10^{-3} \text{ min}^{-1}$ | [10]      |
| PFHxS                 | 10.0                                      | 1000               | 70                                       | Air              | SB (72 g/L<br>Cl <sup>-</sup> ) | pseudo-1st             | $5.67 \times 10^{-4} \text{ min}^{-1}$ | [10]      |
| PFOS                  | 10.0                                      | 1000               | 70                                       | Air              | SB (72 g/L<br>Cl <sup>-</sup> ) | pseudo-1st             | $6.50 \times 10^{-4} \text{ min}^{-1}$ | [10]      |
| 4:2 FTS               | 0.003                                     | 1000               | 70                                       | Air              | Real IX SB<br>(Aptim)           | pseudo-1st             | $2.58 \times 10^{-3} \text{ min}^{-1}$ | [10]      |
| 6:2 FTS               | 0.25                                      | 1000               | 70                                       | Air              | Real IX SB<br>(Aptim)           | pseudo-1st             | $8.83 \times 10^{-4} \text{ min}^{-1}$ | [10]      |
| 8:2 FTS               | 0.045                                     | 1000               | 70                                       | Air              | Real IX SB<br>(Aptim)           | pseudo-1st             | $5.17 \times 10^{-4} \text{ min}^{-1}$ | [10]      |

Continued on next page

Table S7 – *Continued from previous page*

| <b>PFAS<br/>Com-<br/>pound</b> | <b>Initial<br/>Conc.<br/>(mg L<sup>-1</sup>)</b> | <b>Frequency<br/>(kHz)</b> | <b>Power<br/>Density<br/>(W L<sup>-1</sup>)</b> | <b>Dissolved<br/>Gas</b> | <b>Additive</b>       | <b>Rate<br/>Const.<br/>Type</b> | <b>Rate Const.</b>                     | <b>Reference</b> |
|--------------------------------|--------------------------------------------------|----------------------------|-------------------------------------------------|--------------------------|-----------------------|---------------------------------|----------------------------------------|------------------|
| PFBS                           | 0.088                                            | 1000                       | 70                                              | Air                      | Real IX SB<br>(Aptim) | pseudo-1st                      | $1.07 \times 10^{-3} \text{ min}^{-1}$ | [10]             |
| PFPeS                          | 0.079                                            | 1000                       | 70                                              | Air                      | Real IX SB<br>(Aptim) | pseudo-1st                      | $1.05 \times 10^{-3} \text{ min}^{-1}$ | [10]             |
| PFHxS                          | 0.70                                             | 1000                       | 70                                              | Air                      | Real IX SB<br>(Aptim) | pseudo-1st                      | $7.67 \times 10^{-4} \text{ min}^{-1}$ | [10]             |
| PFHpS                          | 0.029                                            | 1000                       | 70                                              | Air                      | Real IX SB<br>(Aptim) | pseudo-1st                      | $5.83 \times 10^{-4} \text{ min}^{-1}$ | [10]             |
| PFOS                           | 1.54                                             | 1000                       | 70                                              | Air                      | Real IX SB<br>(Aptim) | pseudo-1st                      | $5.67 \times 10^{-4} \text{ min}^{-1}$ | [10]             |
| PFOSAm                         | 0.001                                            | 1000                       | 70                                              | Air                      | Real IX SB<br>(Aptim) | pseudo-1st                      | $3.50 \times 10^{-4} \text{ min}^{-1}$ | [10]             |
| PFBA                           | 0.019                                            | 1000                       | 70                                              | Air                      | Real IX SB<br>(Aptim) | pseudo-1st                      | $5.67 \times 10^{-4} \text{ min}^{-1}$ | [10]             |
| PFPeA                          | 0.104                                            | 1000                       | 70                                              | Air                      | Real IX SB<br>(Aptim) | pseudo-1st                      | $1.73 \times 10^{-3} \text{ min}^{-1}$ | [10]             |

*Continued on next page*

Table S7 – *Continued from previous page*

| <b>PFAS<br/>Com-<br/>pound</b> | <b>Initial<br/>Conc.<br/>(mg L<sup>-1</sup>)</b> | <b>Frequency<br/>(kHz)</b> | <b>Power<br/>Density<br/>(W L<sup>-1</sup>)</b> | <b>Dissolved<br/>Gas</b> | <b>Additive</b>              | <b>Rate<br/>Const.<br/>Type</b> | <b>Rate Const.</b>                     | <b>Reference</b> |
|--------------------------------|--------------------------------------------------|----------------------------|-------------------------------------------------|--------------------------|------------------------------|---------------------------------|----------------------------------------|------------------|
| PFHxA                          | 0.196                                            | 1000                       | 70                                              | Air                      | Real IX SB<br>(Aptim)        | pseudo-1st                      | $1.40 \times 10^{-3} \text{ min}^{-1}$ | [10]             |
| PFHpA                          | 0.102                                            | 1000                       | 70                                              | Air                      | Real IX SB<br>(Aptim)        | pseudo-1st                      | $1.25 \times 10^{-3} \text{ min}^{-1}$ | [10]             |
| PFOA                           | 0.534                                            | 1000                       | 70                                              | Air                      | Real IX SB<br>(Aptim)        | pseudo-1st                      | $1.25 \times 10^{-3} \text{ min}^{-1}$ | [10]             |
| PFNA                           | 0.025                                            | 1000                       | 70                                              | Air                      | Real IX SB<br>(Aptim)        | pseudo-1st                      | $9.17 \times 10^{-4} \text{ min}^{-1}$ | [10]             |
| PFDA                           | 0.003                                            | 1000                       | 70                                              | Air                      | Real IX SB<br>(Aptim)        | pseudo-1st                      | $1.98 \times 10^{-3} \text{ min}^{-1}$ | [10]             |
| PFUnDA                         | 0.001                                            | 1000                       | 70                                              | Air                      | Real IX SB<br>(Aptim)        | pseudo-1st                      | $2.00 \times 10^{-4} \text{ min}^{-1}$ | [10]             |
| 8:2 FTS                        | 0.167                                            | 1000                       | 70                                              | Air                      | Real IX SB<br>(1:10<br>Navy) | pseudo-1st                      | $2.00 \times 10^{-4} \text{ min}^{-1}$ | [10]             |

*Continued on next page*

Table S7 – Continued from previous page

| PFAS<br>Com-<br>pound | Initial<br>Conc.<br>(mg L <sup>-1</sup> ) | Frequency<br>(kHz) | Power<br>Density<br>(W L <sup>-1</sup> ) | Dissolved<br>Gas | Additive                     | Rate<br>Const.<br>Type | Rate Const.                            | Reference |
|-----------------------|-------------------------------------------|--------------------|------------------------------------------|------------------|------------------------------|------------------------|----------------------------------------|-----------|
| PFBS                  | 1.343                                     | 1000               | 70                                       | Air              | Real IX SB<br>(1:10<br>Navy) | pseudo-1st             | $4.00 \times 10^{-4} \text{ min}^{-1}$ | [10]      |
| PFPeS                 | 1.526                                     | 1000               | 70                                       | Air              | Real IX SB<br>(1:10<br>Navy) | pseudo-1st             | $3.83 \times 10^{-4} \text{ min}^{-1}$ | [10]      |
| PFHxS                 | 7.155                                     | 1000               | 70                                       | Air              | Real IX SB<br>(1:10<br>Navy) | pseudo-1st             | $4.17 \times 10^{-4} \text{ min}^{-1}$ | [10]      |
| PFOS                  | 9.51                                      | 1000               | 70                                       | Air              | Real IX SB<br>(1:10<br>Navy) | pseudo-1st             | $3.17 \times 10^{-4} \text{ min}^{-1}$ | [10]      |
| PFPeA                 | 0.690                                     | 1000               | 70                                       | Air              | Real IX SB<br>(1:10<br>Navy) | pseudo-1st             | $7.83 \times 10^{-4} \text{ min}^{-1}$ | [10]      |

Continued on next page

Table S7 – *Continued from previous page*

| <b>PFAS<br/>Com-<br/>pound</b> | <b>Initial<br/>Conc.<br/>(mg L<sup>-1</sup>)</b> | <b>Frequency<br/>(kHz)</b> | <b>Power<br/>Density<br/>(W L<sup>-1</sup>)</b> | <b>Dissolved<br/>Gas</b> | <b>Additive</b>              | <b>Rate<br/>Const.<br/>Type</b> | <b>Rate Const.</b>                     | <b>Reference</b> |
|--------------------------------|--------------------------------------------------|----------------------------|-------------------------------------------------|--------------------------|------------------------------|---------------------------------|----------------------------------------|------------------|
| PFHxA                          | 2.378                                            | 1000                       | 70                                              | Air                      | Real IX SB<br>(1:10<br>Navy) | pseudo-1st                      | $8.83 \times 10^{-4} \text{ min}^{-1}$ | [10]             |
| PFHpA                          | 1.787                                            | 1000                       | 70                                              | Air                      | Real IX SB<br>(1:10<br>Navy) | pseudo-1st                      | $6.17 \times 10^{-4} \text{ min}^{-1}$ | [10]             |
| PFOA                           | 46.35                                            | 1000                       | 70                                              | Air                      | Real IX SB<br>(1:10<br>Navy) | pseudo-1st                      | $1.07 \times 10^{-3} \text{ min}^{-1}$ | [10]             |
| PFNA                           | 0.244                                            | 1000                       | 70                                              | Air                      | Real IX SB<br>(1:10<br>Navy) | pseudo-1st                      | $4.50 \times 10^{-4} \text{ min}^{-1}$ | [10]             |
| PFDA                           | 0.120                                            | 1000                       | 70                                              | Air                      | Real IX SB<br>(1:10<br>Navy) | pseudo-1st                      | $8.17 \times 10^{-4} \text{ min}^{-1}$ | [10]             |

*Continued on next page*

Table S7 – Continued from previous page

| PFAS Compound | Initial Conc. (mg L <sup>-1</sup> ) | Frequency (kHz) | Power Density (W L <sup>-1</sup> ) | Dissolved Gas | Additive               | Rate Const. Type | Rate Const.                                                  | Reference |
|---------------|-------------------------------------|-----------------|------------------------------------|---------------|------------------------|------------------|--------------------------------------------------------------|-----------|
| Total PFAS    | 71.8                                | 1000            | 70                                 | Air           | Real IX SB (1:10 Navy) | 0th              | 19.2 μg L <sup>-1</sup> min <sup>-1</sup>                    | [10]      |
| Total PFCA    | 51.7                                | 1000            | 70                                 | Air           | Real IX SB (1:10 Navy) | 0th              | 14.9 μg L <sup>-1</sup> min <sup>-1</sup>                    | [10]      |
| Total PFSA    | 18.7                                | 1000            | 70                                 | Air           | Real IX SB (1:10 Navy) | 0th              | 4.25 μg L <sup>-1</sup> min <sup>-1</sup>                    | [10]      |
| Total FTS     | 0.167                               | 1000            | 70                                 | Air           | Real IX SB (1:10 Navy) | 0th              | 3.83 × 10 <sup>-2</sup> μg L <sup>-1</sup> min <sup>-1</sup> | [10]      |
| 8:2 FTS       | 0.167                               | 1000            | 70                                 | Air           | Real IX SB (1:10 Navy) | 0th              | 3.83 × 10 <sup>-2</sup> μg L <sup>-1</sup> min <sup>-1</sup> | [10]      |

Continued on next page

Table S7 – Continued from previous page

| PFAS<br>Com-<br>pound | Initial<br>Conc.<br>(mg L <sup>-1</sup> ) | Frequency<br>(kHz) | Power<br>Density<br>(W L <sup>-1</sup> ) | Dissolved<br>Gas | Additive                     | Rate<br>Const.<br>Type | Rate Const.                                                     | Reference |
|-----------------------|-------------------------------------------|--------------------|------------------------------------------|------------------|------------------------------|------------------------|-----------------------------------------------------------------|-----------|
| PFBS                  | 1.343                                     | 1000               | 70                                       | Air              | Real IX SB<br>(1:10<br>Navy) | 0th                    | 0.282 μg L <sup>-1</sup> min <sup>-1</sup>                      | [10]      |
| PFPeS                 | 1.526                                     | 1000               | 70                                       | Air              | Real IX SB<br>(1:10<br>Navy) | 0th                    | 0.323 μg L <sup>-1</sup> min <sup>-1</sup>                      | [10]      |
| PFHxS                 | 7.155                                     | 1000               | 70                                       | Air              | Real IX SB<br>(1:10<br>Navy) | 0th                    | 1.56 μg L <sup>-1</sup> min <sup>-1</sup>                       | [10]      |
| PFHpS                 | 0.091                                     | 1000               | 70                                       | Air              | Real IX SB<br>(1:10<br>Navy) | 0th                    | 2.42 × 10 <sup>-2</sup> μg<br>L <sup>-1</sup> min <sup>-1</sup> | [10]      |
| PFOS                  | 9.51                                      | 1000               | 70                                       | Air              | Real IX SB<br>(1:10<br>Navy) | 0th                    | 1.99 μg L <sup>-1</sup> min <sup>-1</sup>                       | [10]      |

Continued on next page

Table S7 – Continued from previous page

| PFAS<br>Com-<br>pound | Initial<br>Conc.<br>(mg L <sup>-1</sup> ) | Frequency<br>(kHz) | Power<br>Density<br>(W L <sup>-1</sup> ) | Dissolved<br>Gas | Additive                     | Rate<br>Const.<br>Type | Rate Const.                                                     | Reference |
|-----------------------|-------------------------------------------|--------------------|------------------------------------------|------------------|------------------------------|------------------------|-----------------------------------------------------------------|-----------|
| PFPeA                 | 0.690                                     | 1000               | 70                                       | Air              | Real IX SB<br>(1:10<br>Navy) | 0th                    | 0.164 μg L <sup>-1</sup> min <sup>-1</sup>                      | [10]      |
| PFHxA                 | 2.378                                     | 1000               | 70                                       | Air              | Real IX SB<br>(1:10<br>Navy) | 0th                    | 0.697 μg L <sup>-1</sup> min <sup>-1</sup>                      | [10]      |
| PFHpA                 | 1.787                                     | 1000               | 70                                       | Air              | Real IX SB<br>(1:10<br>Navy) | 0th                    | 0.479 μg L <sup>-1</sup> min <sup>-1</sup>                      | [10]      |
| PFOA                  | 46.35                                     | 1000               | 70                                       | Air              | Real IX SB<br>(1:10<br>Navy) | 0th                    | 13.5 μg L <sup>-1</sup> min <sup>-1</sup>                       | [10]      |
| PFNA                  | 0.244                                     | 1000               | 70                                       | Air              | Real IX SB<br>(1:10<br>Navy) | 0th                    | 6.62 × 10 <sup>-2</sup> μg<br>L <sup>-1</sup> min <sup>-1</sup> | [10]      |

Continued on next page

Table S7 – Continued from previous page

| PFAS<br>Com-<br>pound | Initial<br>Conc.<br>(mg L <sup>-1</sup> ) | Frequency<br>(kHz) | Power<br>Density<br>(W L <sup>-1</sup> ) | Dissolved<br>Gas | Additive                     | Rate<br>Const.<br>Type | Rate Const.                                                         | Reference |
|-----------------------|-------------------------------------------|--------------------|------------------------------------------|------------------|------------------------------|------------------------|---------------------------------------------------------------------|-----------|
| PFDA                  | 0.120                                     | 1000               | 70                                       | Air              | Real IX SB<br>(1:10<br>Navy) | 0th                    | $4.45 \times 10^{-2} \mu\text{g}$<br>$\text{L}^{-1}\text{min}^{-1}$ | [10]      |
| Total<br>PFAS         | 4.0                                       | 1000               | 70                                       | Air              | Real IX SB<br>(Aptim)        | 0th                    | $1.076 \mu\text{g L}^{-1}\text{min}^{-1}$                           | [10]      |
| Total<br>PFCA         | 1.06                                      | 1000               | 70                                       | Air              | Real IX SB<br>(Aptim)        | 0th                    | $0.302 \mu\text{g L}^{-1}\text{min}^{-1}$                           | [10]      |
| Total<br>PFSA         | 2.38                                      | 1000               | 70                                       | Air              | Real IX SB<br>(Aptim)        | 0th                    | $0.692 \mu\text{g L}^{-1}\text{min}^{-1}$                           | [10]      |
| Total FTS             | 0.296                                     | 1000               | 70                                       | Air              | Real IX SB<br>(Aptim)        | 0th                    | $8.27 \times 10^{-2} \mu\text{g}$<br>$\text{L}^{-1}\text{min}^{-1}$ | [10]      |
| 4:2 FTS               | 0.003                                     | 1000               | 70                                       | Air              | Real IX SB<br>(Aptim)        | 0th                    | $8.33 \times 10^{-4} \mu\text{g}$<br>$\text{L}^{-1}\text{min}^{-1}$ | [10]      |
| 6:2 FTS               | 0.25                                      | 1000               | 70                                       | Air              | Real IX SB<br>(Aptim)        | 0th                    | $7.03 \times 10^{-2} \mu\text{g}$<br>$\text{L}^{-1}\text{min}^{-1}$ | [10]      |
| 8:2 FTS               | 0.045                                     | 1000               | 70                                       | Air              | Real IX SB<br>(Aptim)        | 0th                    | $1.15 \times 10^{-2} \mu\text{g}$<br>$\text{L}^{-1}\text{min}^{-1}$ | [10]      |

Continued on next page

Table S7 – Continued from previous page

| PFAS<br>Com-<br>pound | Initial<br>Conc.<br>(mg L <sup>-1</sup> ) | Frequency<br>(kHz) | Power<br>Density<br>(W L <sup>-1</sup> ) | Dissolved<br>Gas | Additive              | Rate<br>Const.<br>Type | Rate Const.                                                         | Reference |
|-----------------------|-------------------------------------------|--------------------|------------------------------------------|------------------|-----------------------|------------------------|---------------------------------------------------------------------|-----------|
| PFBS                  | 0.088                                     | 1000               | 70                                       | Air              | Real IX SB<br>(Aptim) | 0th                    | $2.27 \times 10^{-2} \mu\text{g}$<br>$\text{L}^{-1}\text{min}^{-1}$ | [10]      |
| PFPeS                 | 0.079                                     | 1000               | 70                                       | Air              | Real IX SB<br>(Aptim) | 0th                    | $2.18 \times 10^{-2} \mu\text{g}$<br>$\text{L}^{-1}\text{min}^{-1}$ | [10]      |
| PFHxS                 | 0.70                                      | 1000               | 70                                       | Air              | Real IX SB<br>(Aptim) | 0th                    | $0.201 \mu\text{g L}^{-1}\text{min}^{-1}$                           | [10]      |
| PFHpS                 | 0.029                                     | 1000               | 70                                       | Air              | Real IX SB<br>(Aptim) | 0th                    | $7.50 \times 10^{-3} \mu\text{g}$<br>$\text{L}^{-1}\text{min}^{-1}$ | [10]      |
| PFOS                  | 1.54                                      | 1000               | 70                                       | Air              | Real IX SB<br>(Aptim) | 0th                    | $0.439 \mu\text{g L}^{-1}\text{min}^{-1}$                           | [10]      |
| PFOSAm                | 0.001                                     | 1000               | 70                                       | Air              | Real IX SB<br>(Aptim) | 0th                    | $3.33 \times 10^{-4} \mu\text{g}$<br>$\text{L}^{-1}\text{min}^{-1}$ | [10]      |
| PFBA                  | 0.019                                     | 1000               | 70                                       | Air              | Real IX SB<br>(Aptim) | 0th                    | $4.67 \times 10^{-3} \mu\text{g}$<br>$\text{L}^{-1}\text{min}^{-1}$ | [10]      |
| PFPeA                 | 0.104                                     | 1000               | 70                                       | Air              | Real IX SB<br>(Aptim) | 0th                    | $2.92 \times 10^{-2} \mu\text{g}$<br>$\text{L}^{-1}\text{min}^{-1}$ | [10]      |

Continued on next page

Table S7 – Continued from previous page

| PFAS<br>Com-<br>pound | Initial<br>Conc.<br>(mg L <sup>-1</sup> ) | Frequency<br>(kHz) | Power<br>Density<br>(W L <sup>-1</sup> ) | Dissolved<br>Gas | Additive              | Rate<br>Const.<br>Type | Rate Const.                                                         | Reference |
|-----------------------|-------------------------------------------|--------------------|------------------------------------------|------------------|-----------------------|------------------------|---------------------------------------------------------------------|-----------|
| PFHxA                 | 0.196                                     | 1000               | 70                                       | Air              | Real IX SB<br>(Aptim) | 0th                    | $5.62 \times 10^{-2} \mu\text{g}$<br>$\text{L}^{-1}\text{min}^{-1}$ | [10]      |
| PFHpA                 | 0.102                                     | 1000               | 70                                       | Air              | Real IX SB<br>(Aptim) | 0th                    | $2.93 \times 10^{-2} \mu\text{g}$<br>$\text{L}^{-1}\text{min}^{-1}$ | [10]      |
| PFOA                  | 0.534                                     | 1000               | 70                                       | Air              | Real IX SB<br>(Aptim) | 0th                    | $0.175 \mu\text{g L}^{-1}\text{min}^{-1}$                           | [10]      |
| PFNA                  | 0.025                                     | 1000               | 70                                       | Air              | Real IX SB<br>(Aptim) | 0th                    | $7.00 \times 10^{-3} \mu\text{g}$<br>$\text{L}^{-1}\text{min}^{-1}$ | [10]      |

## Identified Transformation Products

The following table summarizes the transformation products and intermediates identified across legacy and emerging PFAS species under ultrasonic irradiation.

Table S8: PFAS Sonolysis: Identified Products and Intermediates

| Category                                           |       | Identified Species                                                                                                                                                                                                                                 | Significance / Observations                                                                                                                                                                                                                                                                                                                                               |
|----------------------------------------------------|-------|----------------------------------------------------------------------------------------------------------------------------------------------------------------------------------------------------------------------------------------------------|---------------------------------------------------------------------------------------------------------------------------------------------------------------------------------------------------------------------------------------------------------------------------------------------------------------------------------------------------------------------------|
| Inorganic Products                                 | End-  | $F^-$ , $SO_4^{2-}$ , $CO$ , $CO_2$                                                                                                                                                                                                                | Primary indicators of complete mineralization. High fluoride recovery (>90%) confirms effective defluorination in optimized systems [26].                                                                                                                                                                                                                                 |
|                                                    |       |                                                                                                                                                                                                                                                    |                                                                                                                                                                                                                                                                                                                                                                           |
| Sulfur Species                                     |       | Sulfate ( $SO_4^{2-}$ )                                                                                                                                                                                                                            | Primary sulfur product from PFOS sonolysis. Monitored as a proxy for C-S bond cleavage and mineralization extent.                                                                                                                                                                                                                                                         |
| Carbon Species                                     |       | $CO$ , $CO_2$                                                                                                                                                                                                                                      | $[CO]/[CO_2]$ ratios: 2.0 (PFOA), 5.1 (PFOS), reflecting the degree of pyrolytic oxidation within the bubble.                                                                                                                                                                                                                                                             |
| Reactive Intermediates                             | Vapor | $\cdot CF_3$ , $\cdot CHF_2$ , $:CF_2$ (difluorocarbene), $CF_2$                                                                                                                                                                                   | Short-lived $C_1$ species formed at temperatures >4000 K within or immediately at the bubble interface. $:CF_2$ is a carbene; it reacts rapidly with water/radicals to form $CO$ , $CO_2$ , and $F^-$ .                                                                                                                                                                   |
| Volatile Organic Fluorine (VOF) — Perfluoroalkenes |       | Hexafluoropropylene (HFP, $C_3F_6$ ), perfluorohexene-1 ( $C_6F_{12}$ ), perfluoroheptene-1 ( $C_7F_{14}$ ), perfluorooctene-1 ( $C_8F_{16}$ ); tetrafluoroethylene (TFE, $C_2F_4$ ) expected but unquantified (below short-chain detection limit) | Generated by thermal decomposition of the perfluoroalkyl chain at the bubble interface or within the bubble gas phase. Specifically identified by GC/MS (by retention time and ion fragmentation) in the headspace after 40 h sonolysis of PFOA and PFOS in IX regeneration brine [10]. VOF represented ~1% of initial PFOA fluorine and ~0.05% of initial PFOS fluorine. |

Table S8 – Continued from previous page

| Category                                       | Identified Species                                                                                                                                                                                                                                                                             | Significance / Observations                                                                                                                                                                                                                                      |
|------------------------------------------------|------------------------------------------------------------------------------------------------------------------------------------------------------------------------------------------------------------------------------------------------------------------------------------------------|------------------------------------------------------------------------------------------------------------------------------------------------------------------------------------------------------------------------------------------------------------------|
| <b>Volatile Organic (VOF) Perfluoroalkanes</b> | <b>Or-Fluorine</b> — <b>1H-</b> 1H-perfluorohexane (C <sub>6</sub> HF <sub>13</sub> ), 1H-perfluoroheptane (C <sub>7</sub> HF <sub>15</sub> ), 1H-perfluorooctane (C <sub>8</sub> HF <sub>17</sub> ); shorter-chain homologues (C <sub>1</sub> –C <sub>5</sub> ) likely present but undetected | Partially fluorinated, saturated alkanes formed via H-abstraction reactions in the interfacial zone or by reaction with H· radicals generated from water pyrolysis. Specifically identified by GC/MS in PFOA and PFOS sonolysis headspace by Fuller et al. [10]. |
| <b>Ether Bond Fragments</b>                    | PFPrA (perfluoropropanoic acid), TFPA (trifluoropyruvic acid)                                                                                                                                                                                                                                  | Major aqueous-phase products from the sonolysis of GenX (HFPO-DA) and its homologues. Formed by C-O ether bond homolysis, not C-C cleavage [13].                                                                                                                 |
| <b>HFPO-TeA Specific</b>                       | HFPD ( <i>m/z</i> 182.98)                                                                                                                                                                                                                                                                      | Identified as a major C <sub>3</sub> diol intermediate during HFPO-TeA sonolysis [13].                                                                                                                                                                           |
| <b>Trace Gas-Phase Species</b>                 | CHF <sub>3</sub> , CH <sub>2</sub> F <sub>2</sub> , C <sub>3</sub> F <sub>6</sub> , C <sub>2</sub> F <sub>4</sub>                                                                                                                                                                              | Trace gas-phase fluorinated species with yields typically <0.1% of total fluorine under standard conditions; yields may be higher at elevated power densities or with specific PFAS.                                                                             |
| <b>Minor Organics</b>                          | <b>Aqueous</b> Short-chain PFCAs (PFBA, PFPeA), trace fluorinated ethers                                                                                                                                                                                                                       | Detected at trace levels; generally not the primary degradation pathway for long-chain PFAS, in contrast to other AOPs [26, 41].                                                                                                                                 |

## Mechanism Overview

Transformation is driven by interfacial and vapor-phase pyrolysis. Legacy PFAS undergo headgroup cleavage (C-S or C-C bonds), while emerging ether-PFAS favor C-O ether bond homolysis. The high-energy environment of the cavitating bubble ensures that fluoro-organic intermediates are rapidly converted to inorganic constituents, achieving high defluorination efficiency.

## References

- [1] Awoyemi, O.S., Luo, Y., Niu, J., Naidu, R., Fang, C., 2024. Ultrasonic degradation of per- and polyfluoroalkyl substances (pfas), aqueous film-forming foam (aff) and foam fractionate (ff). *Chemosphere* 360, 142420.
- [2] Awoyemi, O.S., Munyeza, C.F., Sharma, A., Naidu, R., Fang, C., 2025. Ultrasonication degradation of per- and polyfluoroalkyl substances (pfas) in synthetic environmental samples: Impact of ionic composition and water chemistry. *Journal of Water Process Engineering* 77, 108376.
- [3] Campbell, T., Hoffmann, M., 2015. Sonochemical degradation of perfluorinated surfactants: Power and multiple frequency effects. *Sep Purif Technol* 156, 1019–1027. doi:[10.1016/j.seppur.2015.09.053](https://doi.org/10.1016/j.seppur.2015.09.053).
- [4] Campbell, T., Vecitis, C., Mader, B., Hoffmann, M., 2009. Perfluorinated surfactant chain-length effects on sonochemical kinetics. *J Phys Chem A* 113, 9834–9842. doi:[10.1021/jp903003w](https://doi.org/10.1021/jp903003w).
- [5] Cao, H., Zhang, W., Wang, C., Liang, Y., 2020. Sonochemical degradation of poly- and perfluoroalkyl substances - a review. *Ultrasonics Sonochemistry* 69, 105245.
- [6] Cheng, J., Vecitis, C.D., Park, H., Mader, B.T., Hoffmann, M.R., 2010. Sonochemical degradation of perfluorooctane sulfonate (pfos) and perfluorooctanoate (pfoa) in groundwater: kinetic effects of matrix inorganics. *Environmental Science & Technology* 44, 445–450.
- [7] Deng, J., Fang, Y., Hou, C., Zhang, Y., Li, M., Han, J., Du, W., Tang, C., Hu, X., 2023. Ultrasonic assisted activation of persulfate for the treatment of spent porous biochar: Degradation of adsorbed pfoa and adsorbent regeneration. *Journal of Environmental Chemical Engineering* 11, 111146.
- [8] Fagan, W.P., Thayer, S.R., Weavers, L.K., 2023. Kinetics and mechanism of ultrasonic defluorination of fluorotelomer sulfonates. *The Journal of Physical Chemistry A* 127, 6309–6319.
- [9] Fernandez, N., Rodriguez-Freire, L., Keswani, M., Sierra-Alvarez, R., 2016. Effect of chemical structure on the sonochemical degradation of perfluoroalkyl and polyfluoroalkyl substances (pfass). *Environ Sci Water Res Technol* 2, 975–983. doi:[10.1039/c6ew00150e](https://doi.org/10.1039/c6ew00150e).

- [10] Fuller, M.E., Zhao, Y., Hedman, P.C., van Groos, P.G.K., Soto, A., Boodoo, F., Yniguez, J., McKenzie, E.R., 2024. Sonochemical degradation of pfas in ion exchange regeneration wastes. *Journal of Hazardous Materials* 471, 134291.
- [11] Gole, V., Fishgold, A., Sierra-Alvarez, R., Deymier, P., Keswani, M., 2018a. Treatment of perfluorooctane sulfonic acid (pfos) using a large-scale sonochemical reactor. *Sep Purif Technol* 194, 104–110. doi:[10.1016/j.seppur.2017.11.009](https://doi.org/10.1016/j.seppur.2017.11.009).
- [12] Gole, V.L., Sierra-Alvarez, R., Peng, H., Giesy, J.P., Deymier, P., Keswani, M., 2018b. Sonochemical treatment of per- and poly-fluoroalkyl compounds in aqueous film-forming foams by use of a large-scale multi-transducer dual-frequency based acoustic reactor. *Ultrasonics Sonochemistry* 45, 213–222.
- [13] He, X., Cui, D., Quinete, N., O'Shea, K.E., 2025. Ultrasound induced mineralization of legacy and emerging per-and polyfluoroalkyl substances (pfas). *Chemical Engineering Journal* , 164019.
- [14] Hu, Y.b., Lo, S., Li, Y., Lee, Y., Chen, M., Lin, J., 2018. Autocatalytic degradation of perfluorooctanoic acid in a permanganate-ultrasonic system. *Water Res* 140, 148–157. doi:[10.1016/j.watres.2018.04.044](https://doi.org/10.1016/j.watres.2018.04.044).
- [15] Ilić, N., Andalib, A., Lippert, T., Knoop, O., Franke, M., Bräutigam, P., Drewes, J.E., Hübner, U., 2023. Ultrasonic degradation of genx (hfpo-da) - performance comparison to pfoa and pfos at high frequencies. *Chemical Engineering Journal* 472, 144630.
- [16] Kalra, S.S., Cranmer, B., Dooley, G., Hanson, A.J., Maraviov, S., Mohanty, S.K., Blotevogel, J., Mahendra, S., 2021. Sonolytic destruction of per- and polyfluoroalkyl substances in groundwater, aqueous film-forming foams, and investigation derived waste. *Chemical Engineering Journal* 425, 131778.
- [17] Kewalramani, J.A., Marsh, R.W., Prajapati, D., Meegoda, J.N., 2023a. Kinetics effects of the power density and initial concentration on the sonochemical degradation of pfos and pfoa in concentrated waste. *Journal of Water Process Engineering* 53, 103752.
- [18] Kewalramani, J.A., de Souza, B.B., Marsh, R.W., Meegoda, J.N., 2023b. Contributions of reactor geometry and ultrasound frequency on the efficiency of sonochemical reactor. *Ultrasonics Sonochemistry* 98, 106529.
- [19] Khoshyan, A., Luo, Y., Nolan, A., Megharaj, M., Naidu, R., Fang, C., 2024. Degradation of

- per-and poly-fluoroalkyl substances (pfas) using ultrasonication: Effect of reactor materials. *Journal of Water Process Engineering* 63, 105511.
- [20] Laramay, F., Crimi, M., 2020a. A sustainability assessment of an in situ ultrasonic reactor for remediation of pfas-contaminated groundwater. *Remediation* 31, 59–72.
- [21] Laramay, F., Crimi, M., 2020b. Theoretical evaluation of chemical and physical feasibility of an in situ ultrasonic reactor for remediation of groundwater contaminated with per- and polyfluoroalkyl substances. *Remediation* 31, 45–58.
- [22] Lee, Y., Chen, M., Huang, C., Kuo, J., Lo, S., 2016. Efficient sonochemical degradation of perfluorooctanoic acid using periodate. *Ultrason Sonochem* 31, 499–505. doi:[10.1016/j.ultsonch.2016.01.030](https://doi.org/10.1016/j.ultsonch.2016.01.030).
- [23] Lei, Y.J., Tian, Y., Sobhani, Z., Naidu, R., Fang, C., 2020. Synergistic degradation of pfas in water and soil by dual-frequency ultrasonic activated persulfate. *Chemical Engineering Journal* 388, 124215.
- [24] Luo, Y., Khoshyan, A., Al Amin, M., Nolan, A., Robinson, F., Fenstermacher, J., Niu, J., Megharaj, M., Naidu, R., Fang, C., 2023. Ultrasound-enhanced magnéli phase  $ti_4O_7$  anodic oxidation of per- and polyfluoroalkyl substances (pfas) towards remediation of aqueous film forming foams (aff). *Science of the Total Environment* 862, 160836.
- [25] Ma, J., Zou, M., Luo, Z., Duan, X., Chen, F., 2025. Efficient removal of perfluorooctanoic acid in aqueous solution via water flow-driven piezocatalytic degradation and a cavitation-impinging stream reactor. *Separation and Purification Technology* 365, 132701.
- [26] Marsh, R.W., Kewalramani, J.A., Bezerra de Souza, B., Meegoda, J.N., 2024. The use of a fluorine mass balance to demonstrate the mineralization of pfas by high frequency and high power ultrasound. *Chemosphere* 352, 141270.
- [27] Meegoda, J.N., Bezerra de Souza, B., Casarini, M.M., Kewalramani, J.A., 2022. A review of pfas destruction technologies. *International journal of environmental research and public health* 19, 16397.
- [28] Meegoda, J.N., de Souza, B.B., Teymourian, T., Perera, D.C., Juriasingani, P., Davis, J., 2025. Ultrasound for degradation of complex matrices of pfas mixtures. *Environmental Science and Pollution Research* 32, 23645–23666.

- [29] Moriwaki, H., Takagi, Y., Tanaka, M., Tsuruho, K., Okitsu, K., Maeda, Y., 2005. Sonochemical decomposition of perfluorooctane sulfonate and perfluorooctanoic acid. *Environ Sci Technol* 39, 3388–3392. doi:[10.1021/es040342v](https://doi.org/10.1021/es040342v).
- [30] Panchangam, S., Lin, A., Tsai, J., Lin, C., 2009. Sonication-assisted photocatalytic decomposition of perfluorooctanoic acid. *Chemosphere* 75, 654–660. doi:[10.1016/j.chemosphere.2008.12.065](https://doi.org/10.1016/j.chemosphere.2008.12.065).
- [31] Panda, D., Cochenec, M., Colombano, S., Laulier, B., Tierce, P., Baudouard, A., Bristeau, S., Togola, A., Lions, J., Devau, N., et al., 2025. The accurate determination of perfluorooctane sulfonic acid (pfos) removal efficiency by integrated-sonochemical system. *Ultrasonics Sonochemistry* 113, 107222.
- [32] Panda, D., Sethu, V., Manickam, S., 2019. Kinetics and mechanism of low-frequency ultrasound driven elimination of trace level aqueous perfluorooctanesulfonic acid and perfluorooctanoic acid. *Chem Eng Process - Process Intensif* 142, 107542. doi:[10.1016/j.cep.2019.107542](https://doi.org/10.1016/j.cep.2019.107542).
- [33] Rodriguez-Freire, L., Balachandran, R., Sierra-Alvarez, R., Keswani, M., 2015. Effect of sound frequency and initial concentration on the sonochemical degradation of perfluorooctane sulfonate (pfos). *Journal of hazardous materials* 300, 662–669.
- [34] Shende, T., Andaluri, G., Suri, R., 2021a. Frequency-dependent sonochemical degradation of perfluoroalkyl substances and numerical analysis of cavity dynamics. *Separation and Purification Technology* 261, 118250.
- [35] Shende, T., Andaluri, G., Suri, R., 2021b. Power density modulated ultrasonic degradation of perfluoroalkyl substances with and without sparging argon. *Ultrasonics Sonochemistry* 76, 105639.
- [36] Shende, T., Andaluri, G., Suri, R., 2023. Chain-length dependent ultrasonic degradation of perfluoroalkyl substances. *Chemical Engineering Journal Advances* 15, 100509.
- [37] Shende, T., Andaluri, G., Suri, R.P., 2019. Kinetic model for sonolytic degradation of non-volatile surfactants: Perfluoroalkyl substances. *Ultrasonics Sonochemistry* 51, 359–368.
- [38] Sidnell, T., Cobos, A.J.C., Hurst, J., Lee, J., Bussemaker, M.J., 2023. Flow and temporal effects on the sonolytic defluorination of perfluorooctane sulfonic acid. *Ultrasonics sonochemistry* 101, 106667.

- [39] Sidnell, T., Hurst, J., Lee, J., Bussemaker, M.J., 2024. Increasing efficiency and treatment volumes for sonolysis of per-and poly-fluorinated substances, applied to aqueous film-forming foam. *Ultrasonics sonochemistry* 105, 106866.
- [40] Sidnell, T., Wood, R.J., Hurst, J., Lee, J., Bussemaker, M.J., 2022. Sonolysis of per- and poly fluoroalkyl substances (pfas): A meta-analysis. *Ultrasonics Sonochemistry* 87, 105944.
- [41] Sidnell, T.P., 2023. Towards upscaling the sonolysis of per-and poly-fluoroalkyl substances (PFAS). Ph.D. thesis. University of Surrey.
- [42] Thi, L.A.P., Do, H.T., Lo, S.L., 2014. Enhancing decomposition rate of perfluorooctanoic acid by carbonate radical assisted sonochemical treatment. *Ultrasonics sonochemistry* 21, 1875–1880.
- [43] Vecitis, C., Park, H., Cheng, J., Mader, B., Hoffmann, M., 2008a. Enhancement of perfluorooctanoate and perfluorooctanesulfonate activity at acoustic cavitation bubble interfaces. *The Journal of Physical Chemistry C* 112, 16850–16857.
- [44] Vecitis, C.D., Park, H., Cheng, J., Mader, B.T., Hoffmann, M.R., 2008b. Kinetics and mechanism of the sonolytic conversion of the aqueous perfluorinated surfactants, perfluorooctanoate (pfoa), and perfluorooctane sulfonate (pfos) into inorganic products. *The Journal of Physical Chemistry A* 112, 4261–4270.
- [45] Wood, R., Sidnell, T., Ross, I., et al, 2020. Ultrasonic degradation of perfluorooctane sulfonic acid (pfos) correlated with sonochemical and sonoluminescence characterisation. *Ultrason Sonochem* 68, 105196. doi:[10.1016/j.ultsonch.2020.105196](https://doi.org/10.1016/j.ultsonch.2020.105196).
- [46] Woodard, S., Berry, J., Newman, B., 2017. Ion exchange vs. gac for pfas removal: A comparative study. *Remediation Journal* 27, 19–28.
- [47] Xiong, X., Shang, Y., Bai, L., Luo, S., Seviour, T.W., Guo, Z., Ottosen, L.D., Wei, Z., 2023. Complete defluorination of perfluorooctanoic acid (pfoa) by ultrasonic pyrolysis towards zero fluoro-pollution. *Water Research* 235, 119829.
- [48] Yao, S., Lin, J., He, S., Bai, Y., Jin, M., Fang, J., Zhu, F., Wang, M., 2025. Highly efficient degradation of perfluoroalkyl substances (pfas) by a novel polytetrafluoroethylene piezocatalyst. *Journal of Hazardous Materials* 488, 137317.
- [49] Zhang, W., Zhang, Q., Liang, Y., 2022. Ineffectiveness of ultrasound at low frequency for treating per- and polyfluoroalkyl substances in sewage sludge. *Chemosphere* 286, 131748.
